# Supplementary material
Source: PubMed Central journal article supplement (PMC6645956)
Supplement: ao8b00409_si_001.pdf [file ao8b00409_si_001.pdf]

# Supporting Information

## Design, Synthesis and Biological Evaluations of Asymmetric Bow-Tie PAMAM Dendrimer-Based Conjugates for Tumor-Targeted Drug Delivery

Tao Wang,<sup>†</sup> Yaozhong Zhang,<sup>†</sup> Longfei Wei,<sup>†</sup> Yuhan G. Teng,<sup>†</sup> Tadashi Honda<sup>†,‡</sup> and Iwao Ojima<sup>\*,†,‡</sup>

<sup>†</sup> Department of Chemistry and <sup>‡</sup> Institute of Chemical Biology and Drug Discovery, Stony Brook University, Stony Brook, New York 11794-3400, U. S. A.

|                                                                           |                |
|---------------------------------------------------------------------------|----------------|
| <b><sup>1</sup>H and <sup>13</sup>C NMR spectra of new compounds.....</b> | <b>S2-S18</b>  |
| <b>MALDI-TOF and LC-UV-TOF analyses of key intermediates .....</b>        | <b>S19-S28</b> |
| <b>GPC analysis for ABTD-TTC conjugates 1-3 .....</b>                     | <b>S29-S31</b> |
| <b>Confocal fluorescence microscopy and flow cytometry analyses.....</b>  | <b>S32-S35</b> |

---

\*Corresponding author: E-mail [iwao.ojima@stonybrook.edu](mailto:iwao.ojima@stonybrook.edu)

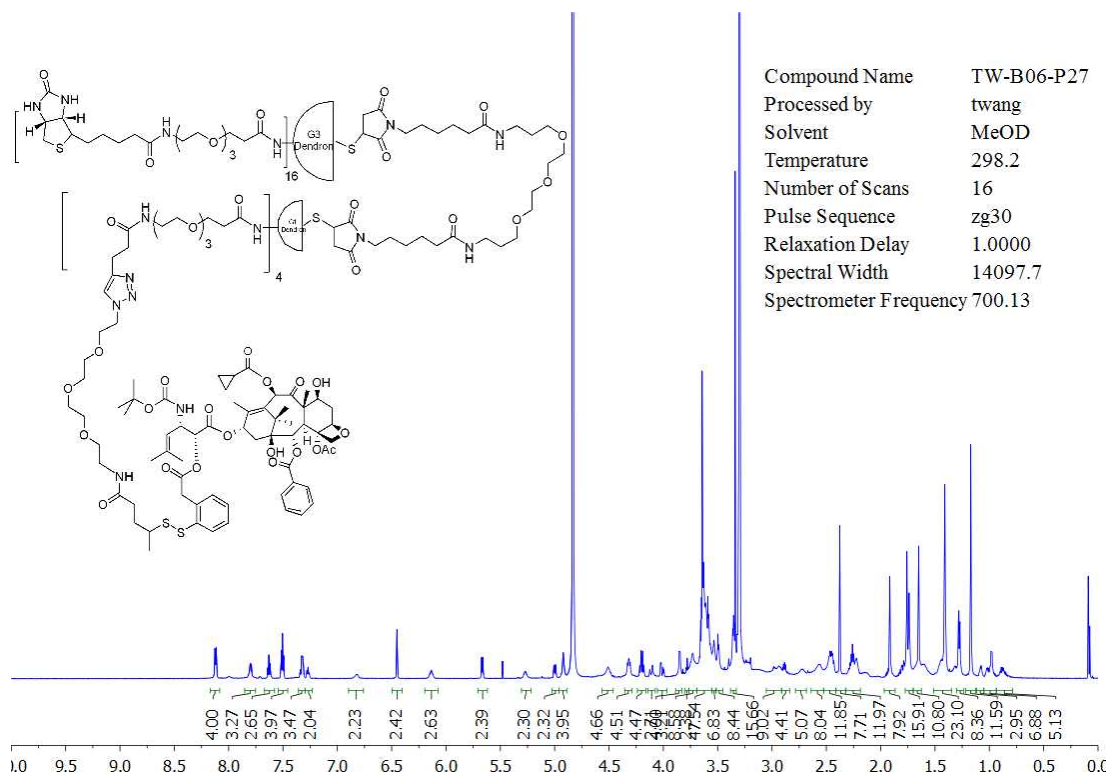

Figure S1. <sup>1</sup>H NMR spectrum of 1

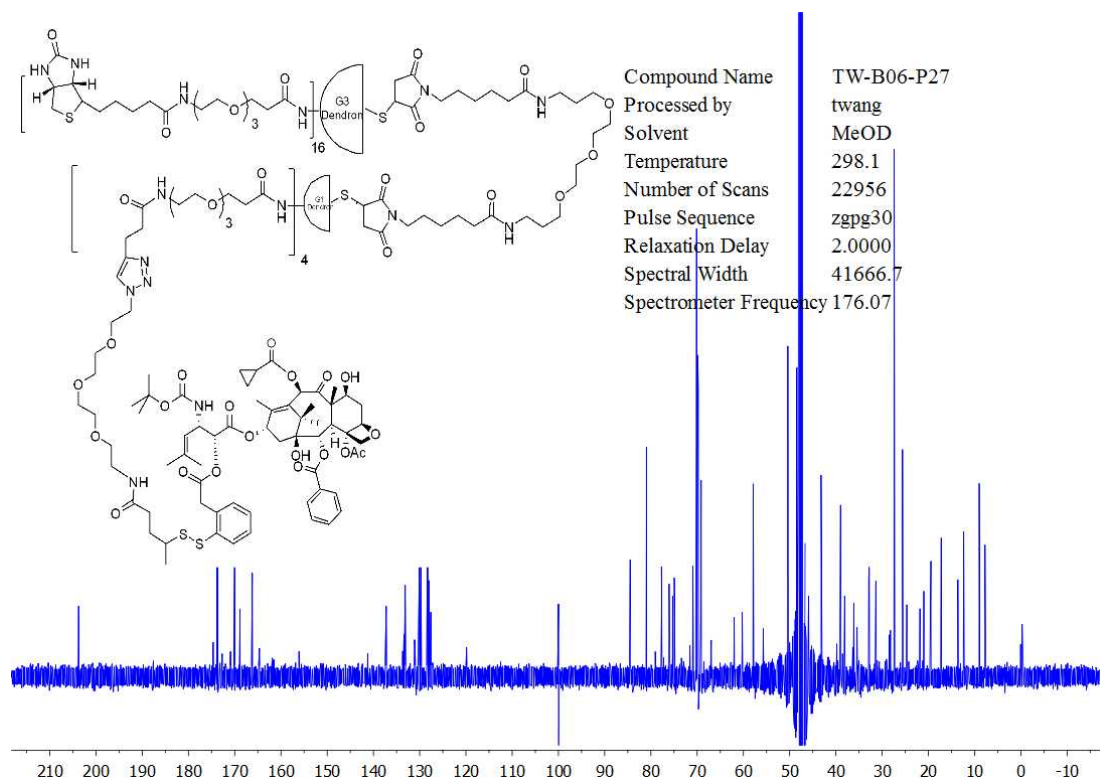

Figure S2. <sup>13</sup>C NMR spectrum of 1

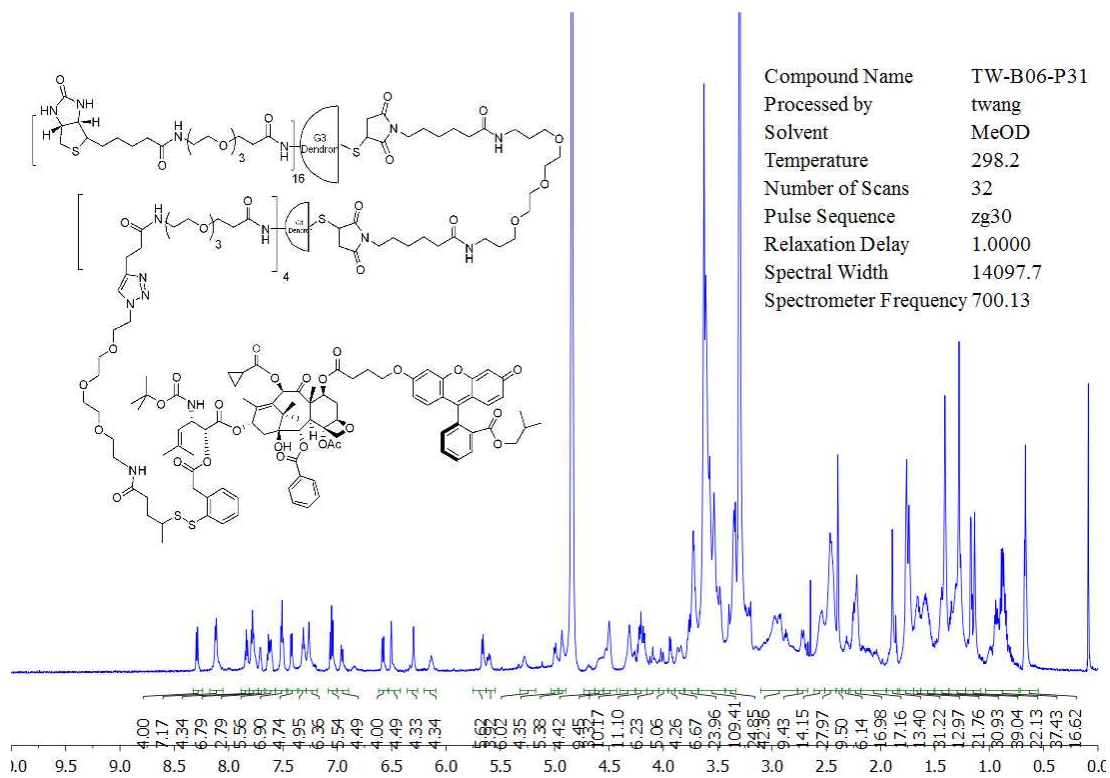

Figure S3. <sup>1</sup>H NMR spectrum of 2

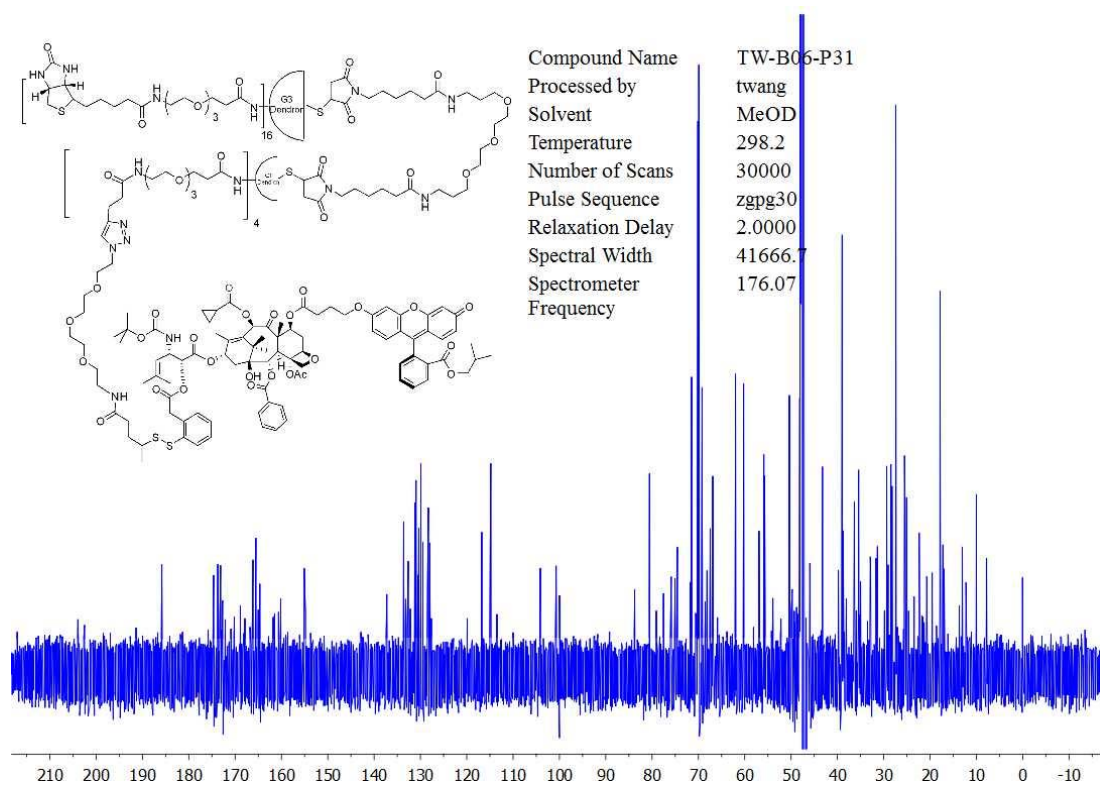

Figure S4. <sup>13</sup>C NMR spectrum of 2

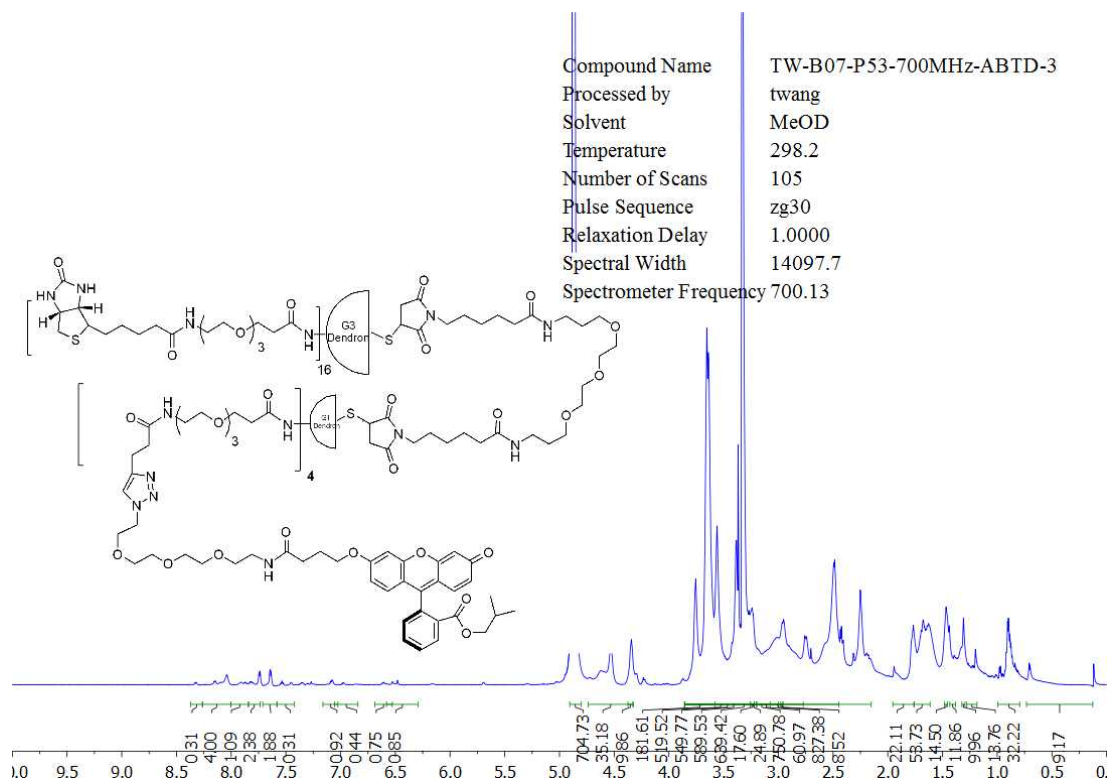

Figure S5.  $^1\text{H}$  NMR spectrum of **3**

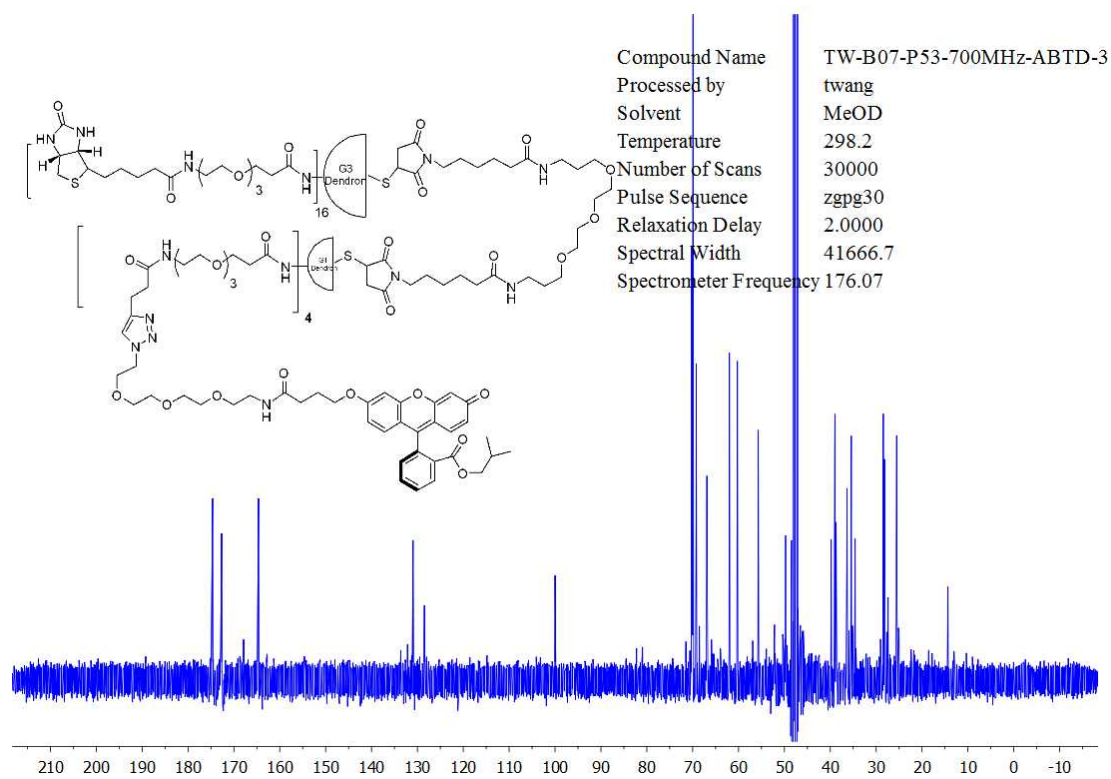

Figure S6.  $^{13}\text{C}$  NMR spectrum of **3**

Compound Name TW-B05-P42  
 Processed by twang  
 Solvent CDCl3  
 Temperature 298.2  
 Number of Scans 16  
 Pulse Sequence zg30  
 Relaxation Delay 1.0000  
 Spectral Width 10000.0  
 Spectrometer Frequency 499.89

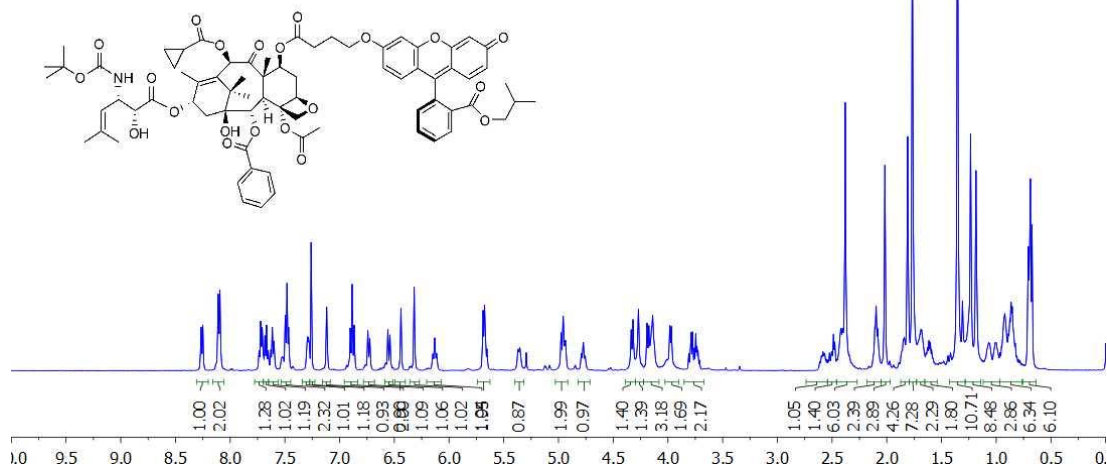

Figure S7. <sup>1</sup>H NMR spectrum of 5

Compound Name TW-B05-P42  
 Processed by twang  
 Solvent CDCl3  
 Temperature 298.3  
 Number of Scans 904  
 Pulse Sequence zgpg30  
 Relaxation Delay 2.0000  
 Spectral Width 29761.9  
 Spectrometer Frequency 125.71

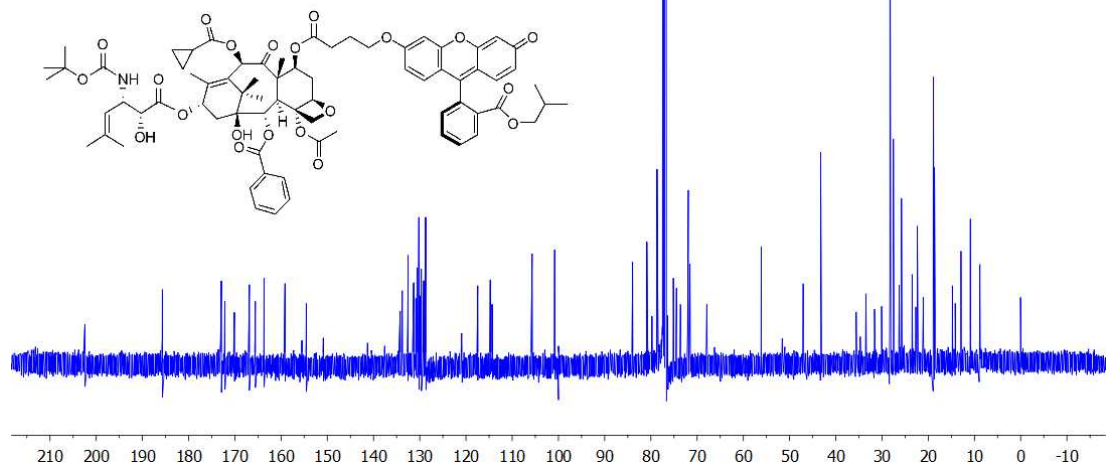

Figure S8. <sup>13</sup>C NMR spectrum of 5

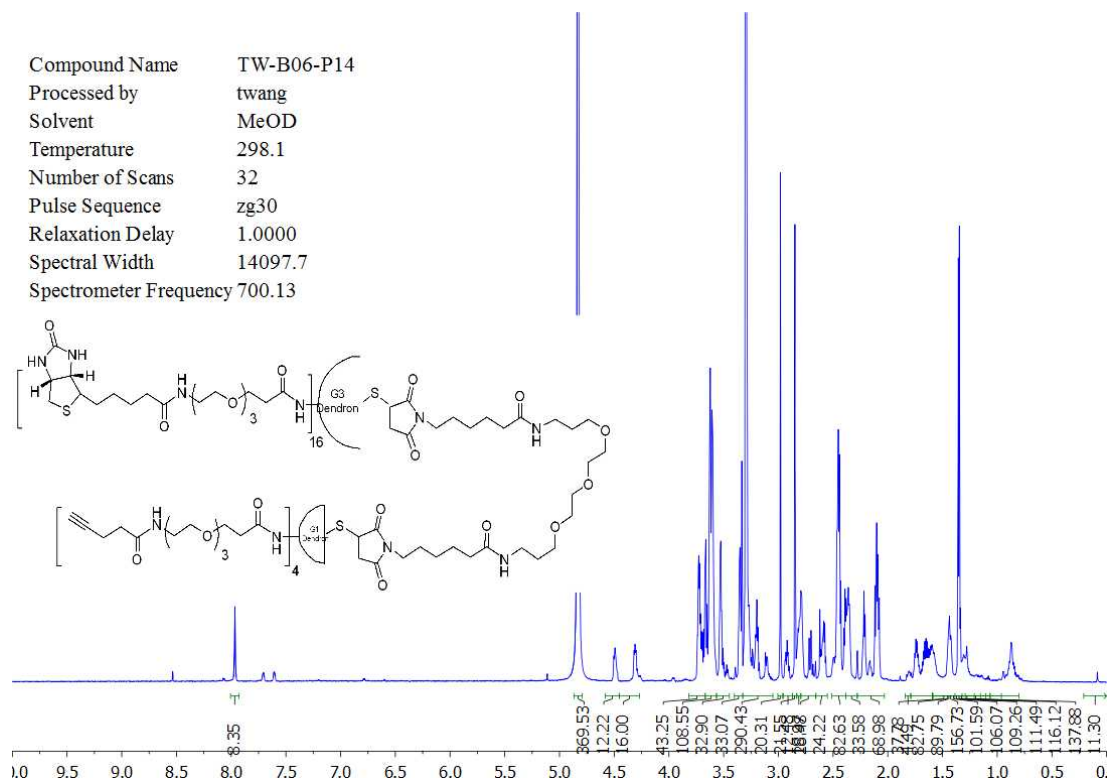

**Figure S9.**  $^1\text{H}$  NMR spectrum of **6**

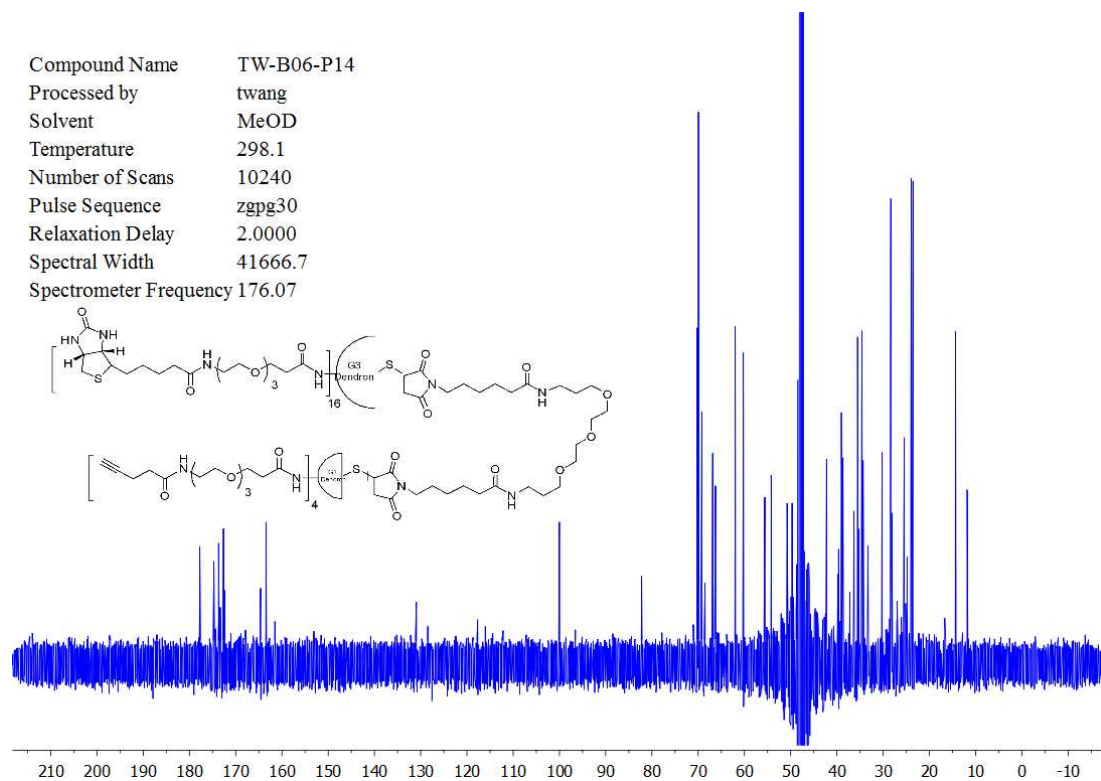

**Figure S10.**  $^{13}\text{C}$  NMR spectrum of **6**

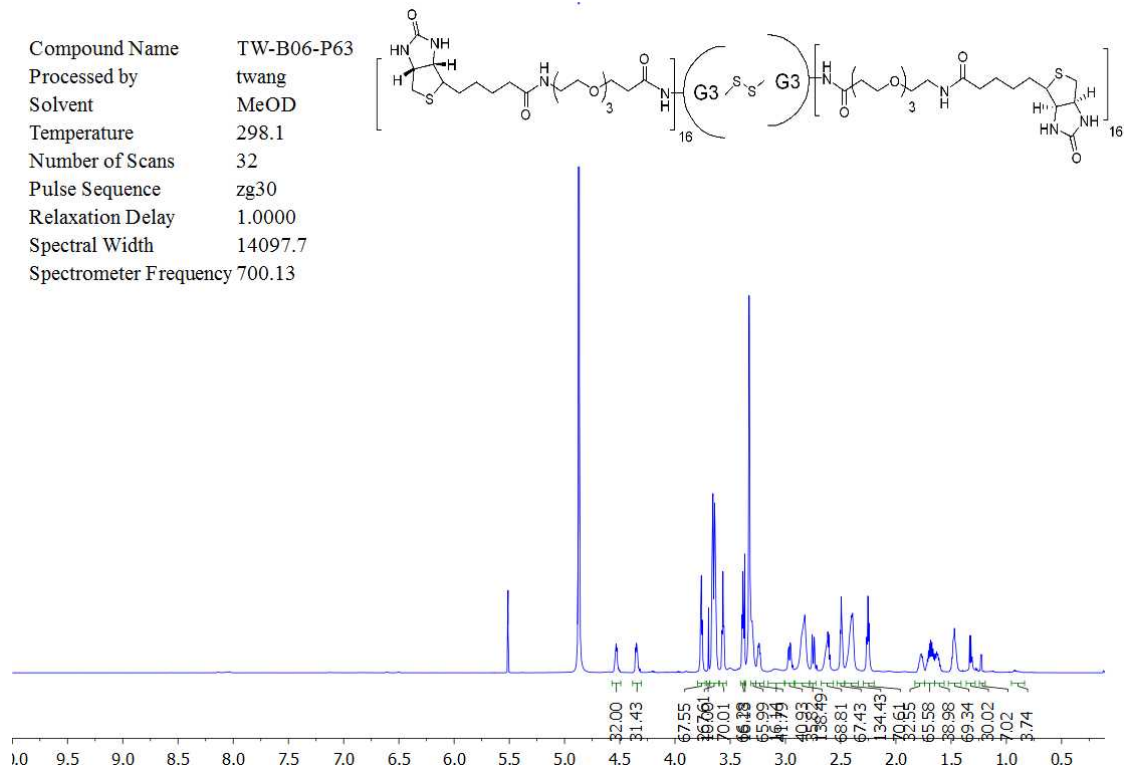

Figure S11.  $^1\text{H}$  NMR spectrum of **7**

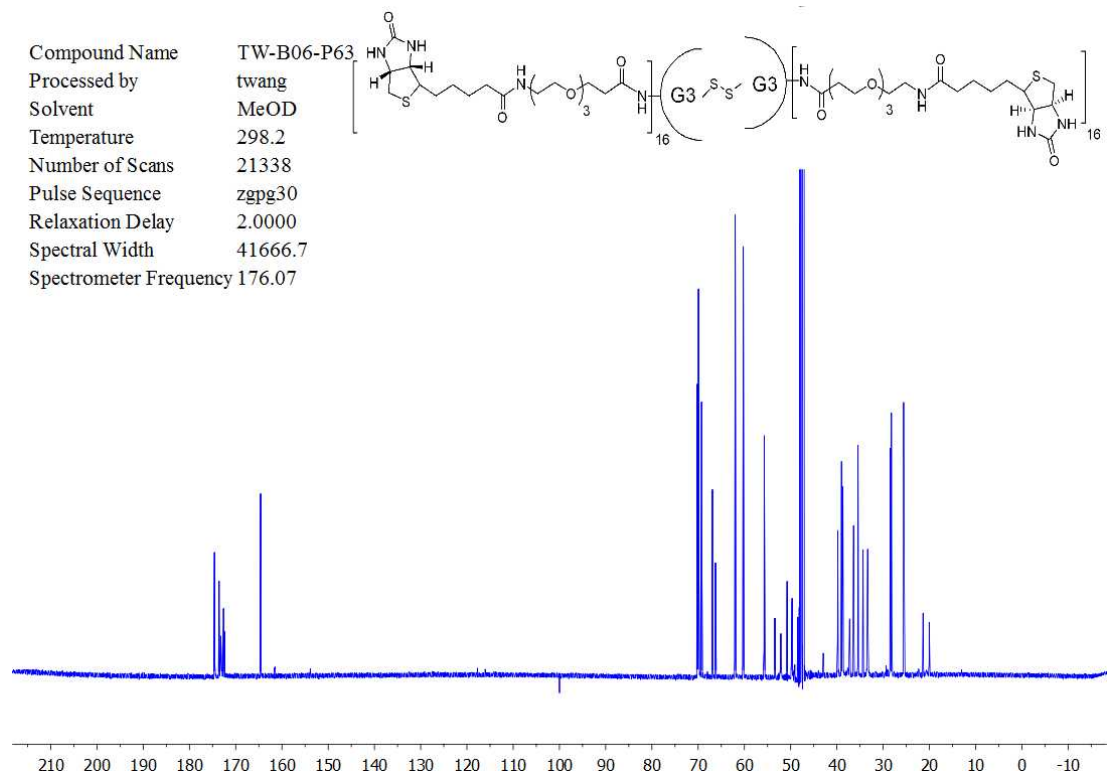

Figure S12.  $^{13}\text{C}$  NMR spectrum of **7**

Compound Name TW-B07-P98-700MHz-MeOD  
 Processed by twang  
 Solvent MeOD  
 Temperature 298.2  
 Number of Scans 32  
 Pulse Sequence zg30  
 Relaxation Delay 1.0000  
 Spectral Width 14097.7  
 Spectrometer Frequency 700.13

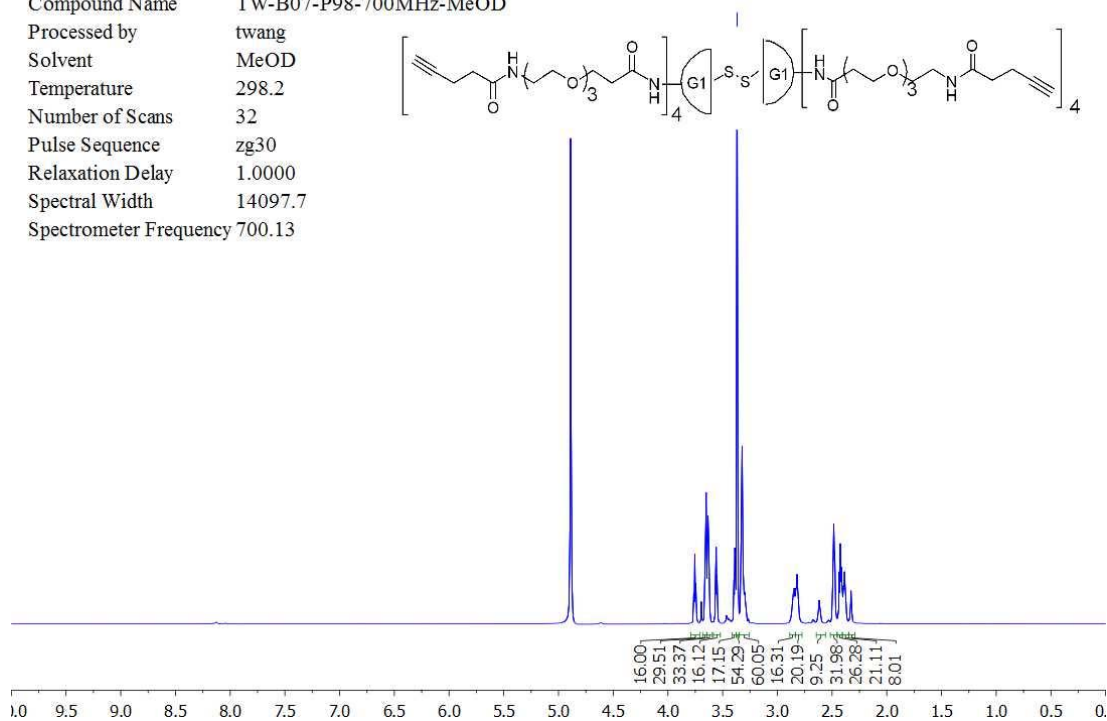

**Figure 13.**  $^1\text{H}$  NMR spectrum of **8**

Compound Name TW-B07-P98-700MHz-MeOD  
 Processed by twang  
 Solvent MeOD  
 Temperature 298.2  
 Number of Scans 2186  
 Pulse Sequence zgpg30  
 Relaxation Delay 2.0000  
 Spectral Width 41666.7  
 Spectrometer Frequency 176.07

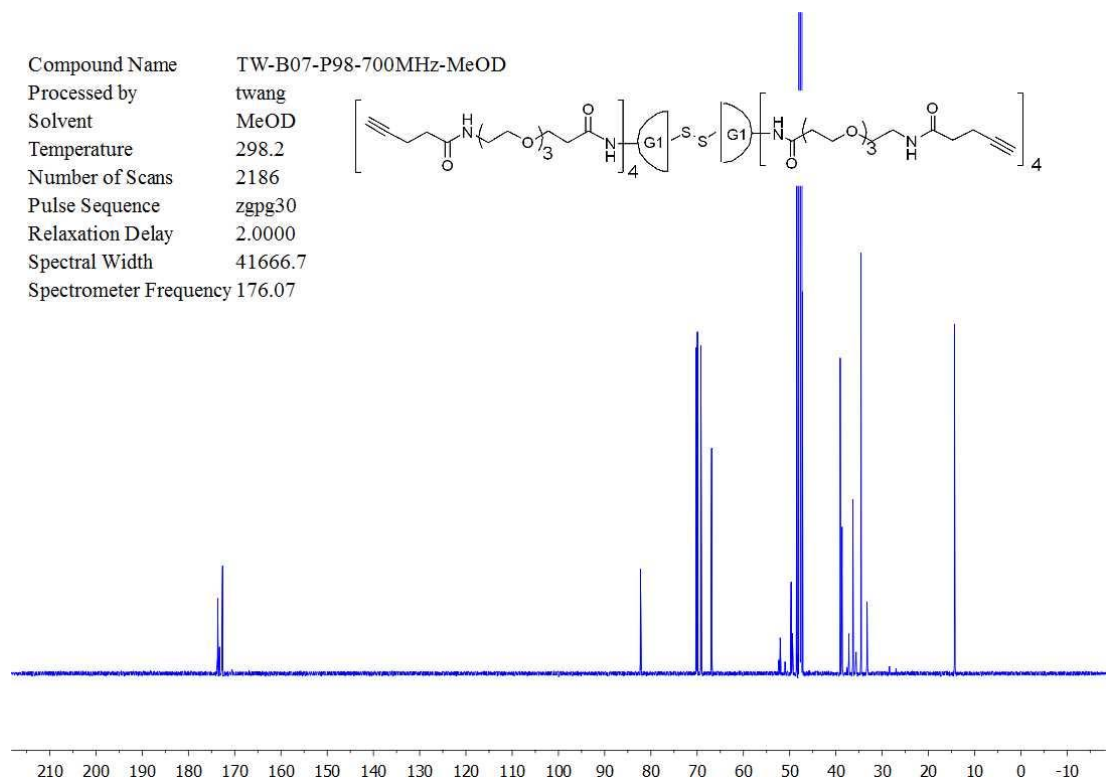

**Figure S14.**  $^{13}\text{C}$  NMR spectrum of **8**



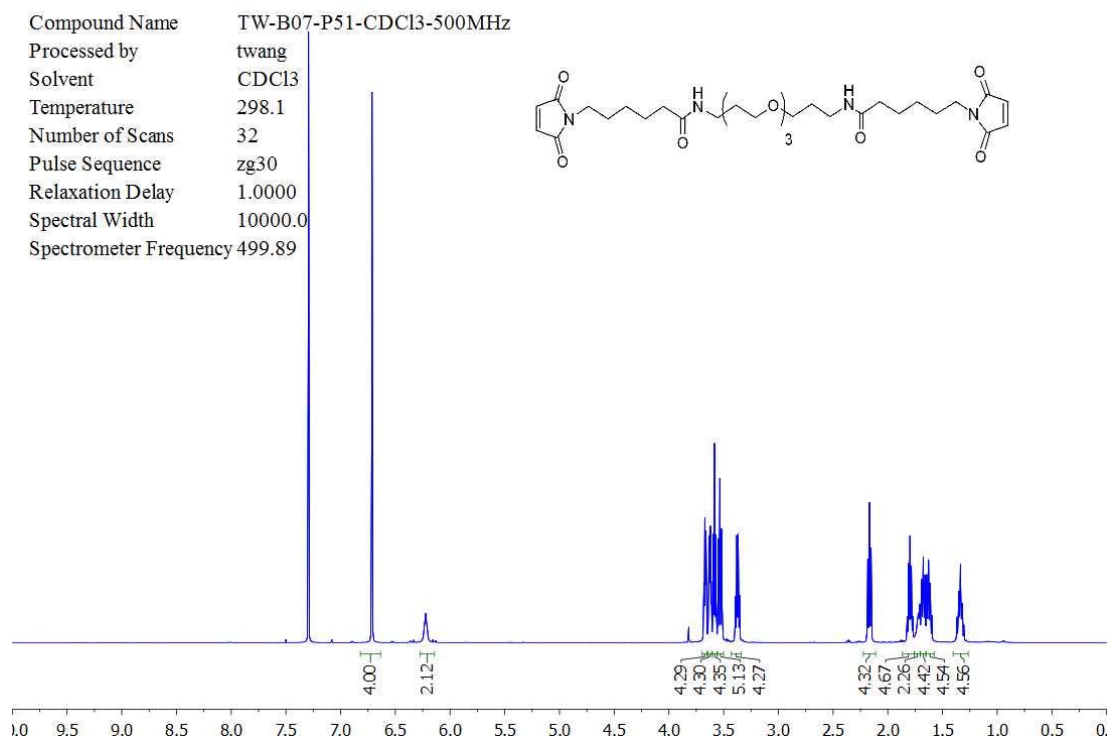

**Figure S15.**  $^1\text{H}$  NMR spectrum of **9**

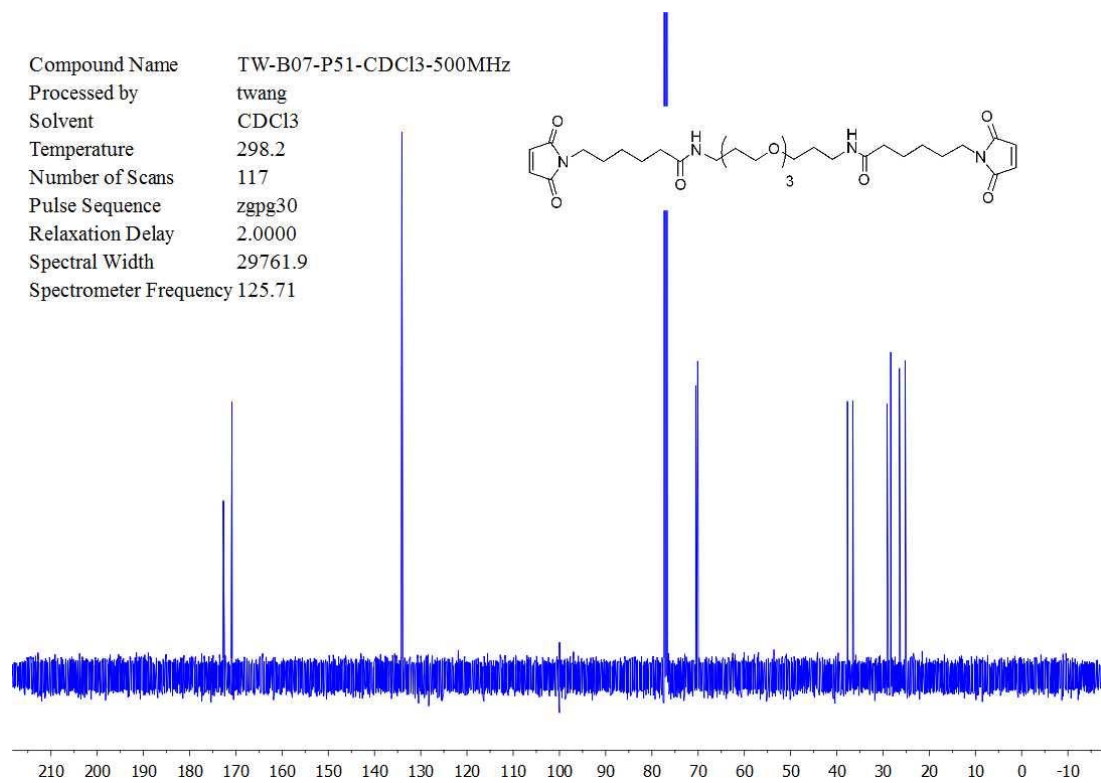

**Figure S16.**  $^{13}\text{C}$  NMR spectrum of **9**

Compound Name TW-B05-P104  
 Processed by twang  
 Solvent MeOD  
 Temperature 298.1  
 Number of Scans 32  
 Pulse Sequence zg30  
 Relaxation Delay 1.0000  
 Spectral Width 14097.7  
 Spectrometer Frequency 700.13

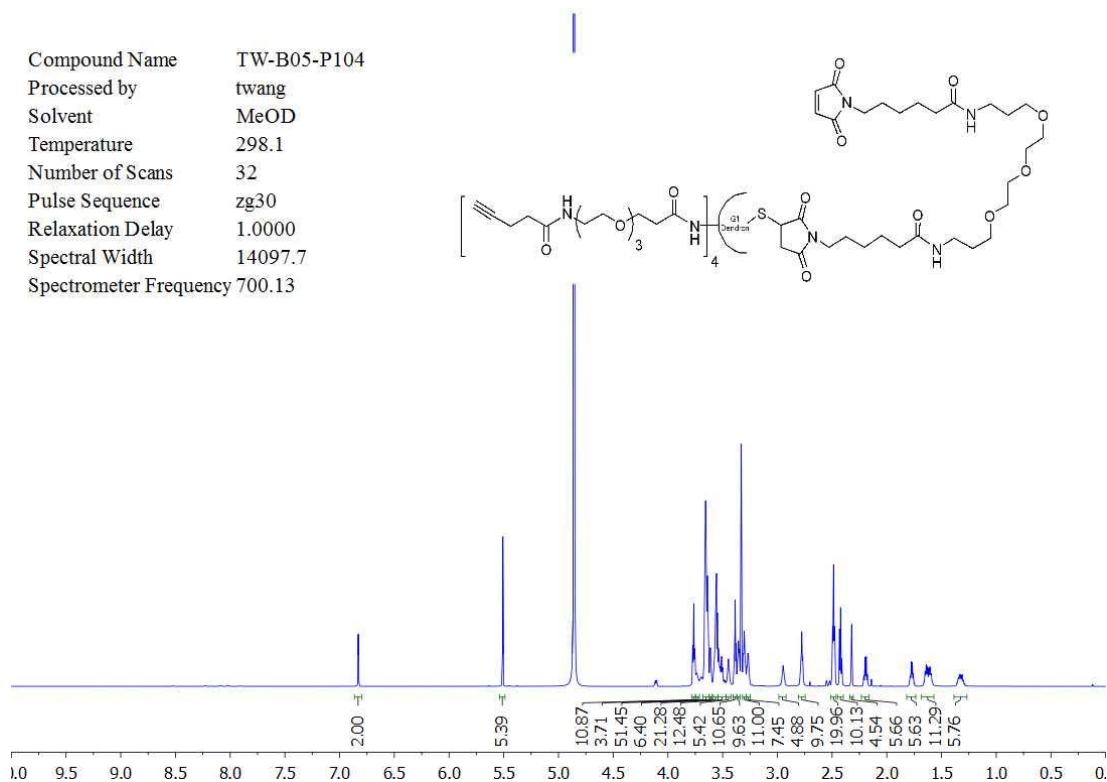

**Figure S17.**  $^1\text{H}$  NMR spectrum of **12**

Compound Name TW-B05-P104  
 Processed by twang  
 Solvent MeOD  
 Temperature 298.1  
 Number of Scans 3582  
 Pulse Sequence zgpg30  
 Relaxation Delay 2.0000  
 Spectral Width 41666.7  
 Spectrometer Frequency 176.07

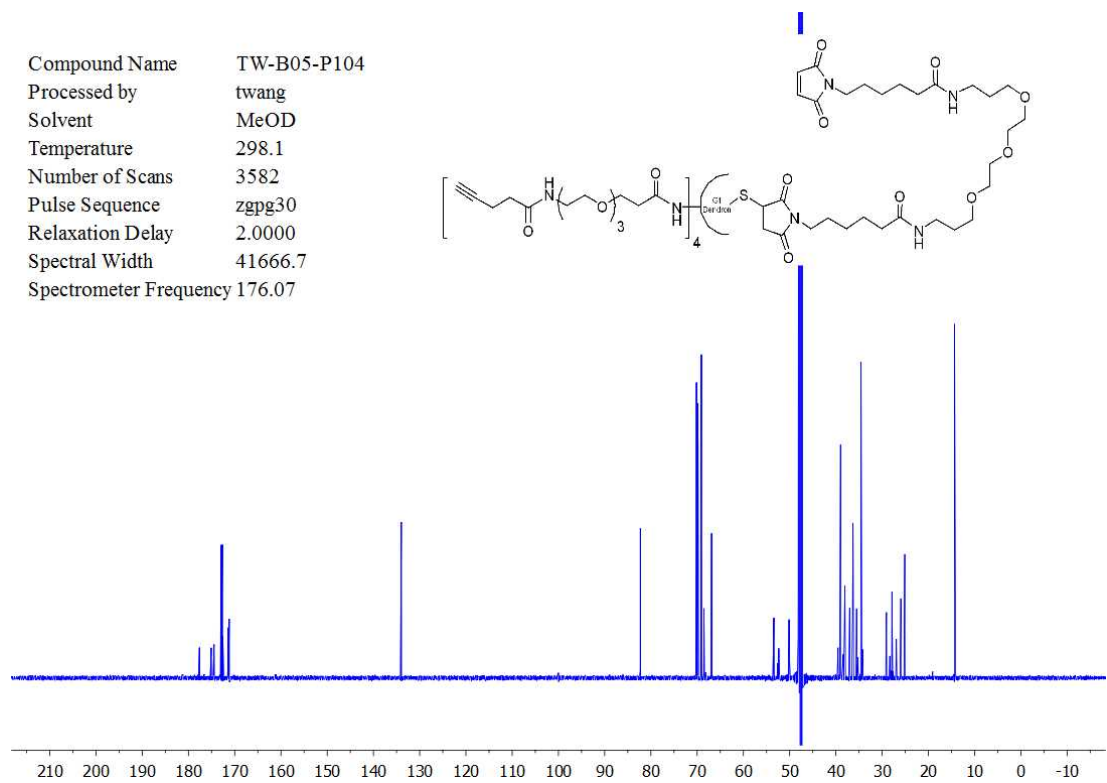

**Figure S18.**  $^{13}\text{C}$  NMR spectrum of **12**

Compound Name TW-B05-P25  
 Processed by twang  
 Solvent CDCl3  
 Temperature 298.2  
 Number of Scans 16  
 Pulse Sequence zg30  
 Relaxation Delay 1.0000  
 Spectral Width 10000.0  
 Spectrometer Frequency 499.89

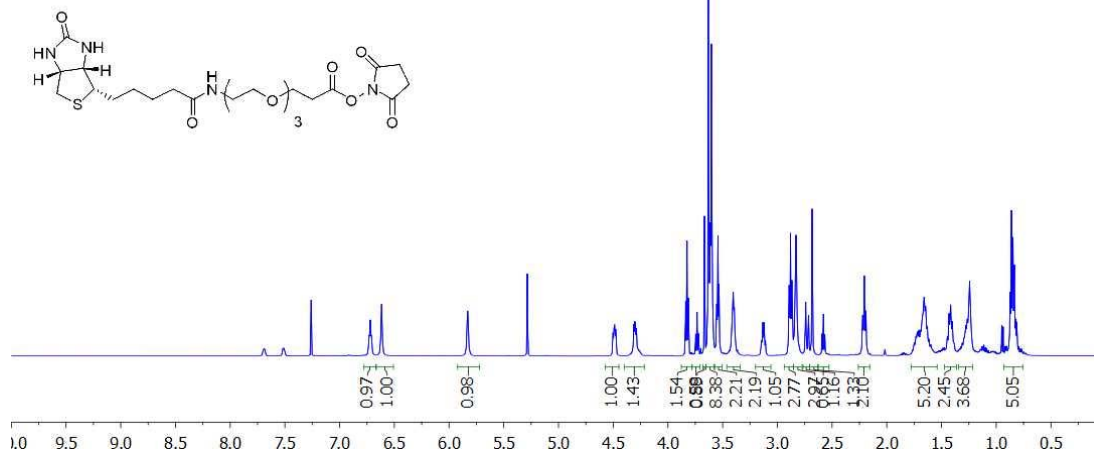

**Figure S19.**  $^1\text{H}$  NMR spectrum of **14**

Compound Name TW-B05-P25  
 Processed by twang  
 Solvent CDCl3  
 Temperature 298.2  
 Number of Scans 203  
 Pulse Sequence zgpg30  
 Relaxation Delay 2.0000  
 Spectral Width 29761.9  
 Spectrometer Frequency 125.71

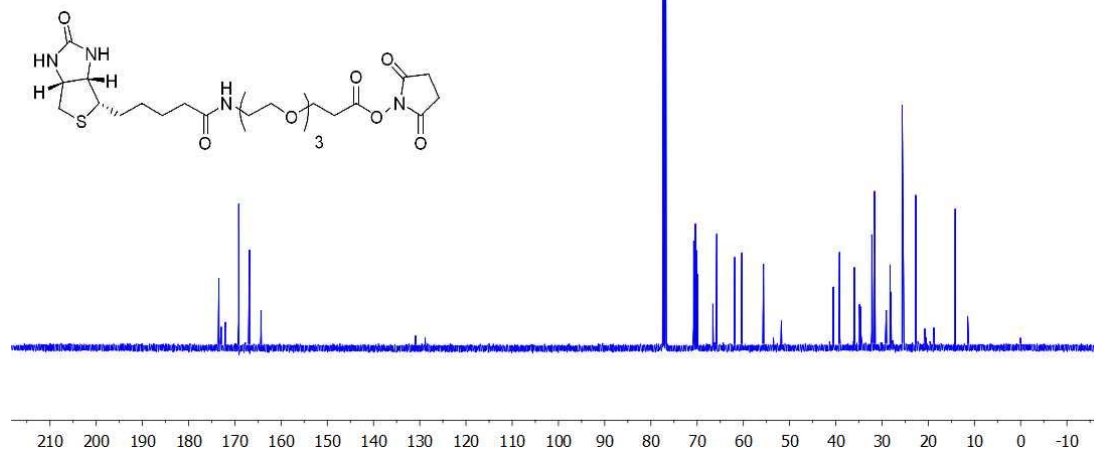

**Figure S20.**  $^{13}\text{C}$  NMR spectrum of **14**

Compound Name TW-B07-P93-500MHz  
 Processed by twang  
 Solvent CDCl3  
 Temperature 298.2  
 Number of Scans 16  
 Pulse Sequence zg30  
 Relaxation Delay 1.0000  
 Spectral Width 10000.0  
 Spectrometer Frequency 499.89

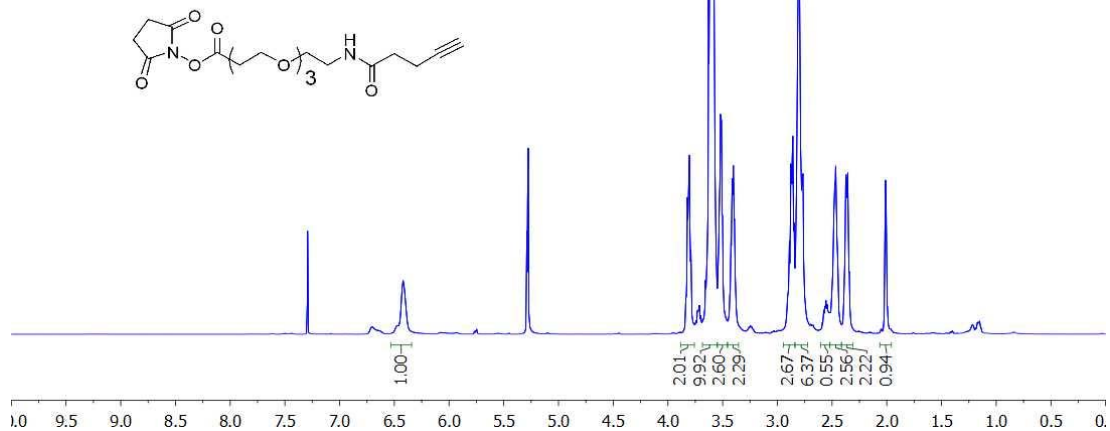

**Figure S21**  $^1\text{H}$  NMR spectrum of **16**

Compound Name TW-B07-P93-500MHz  
 Processed by twang  
 Solvent CDCl3  
 Temperature 298.1  
 Number of Scans 69  
 Pulse Sequence zgpg30  
 Relaxation Delay 2.0000  
 Spectral Width 29761.9  
 Spectrometer Frequency 125.71

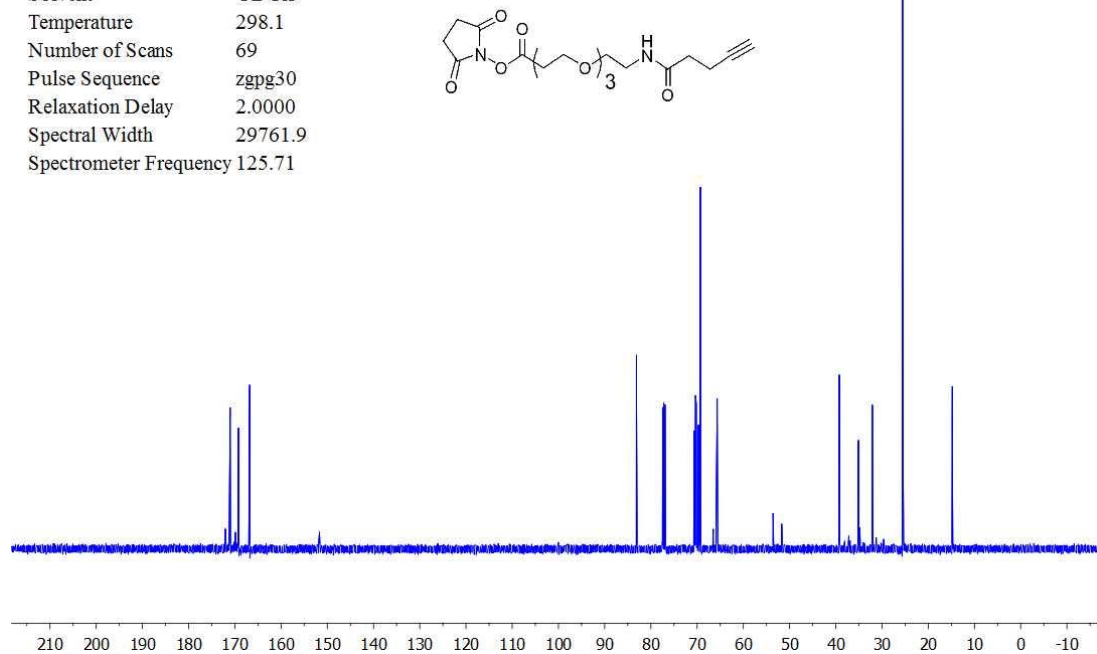

**Figure S22.**  $^{13}\text{C}$  NMR spectrum of **16**



Compound Name TW-B05-P100  
Processed by twang  
Solvent CDCl3  
Temperature 298.1  
Number of Scans 16  
Pulse Sequence zg30  
Relaxation Delay 1.0000  
Spectral Width 10000.0  
Spectrometer Frequency 499.89

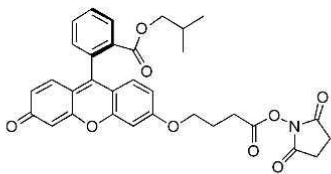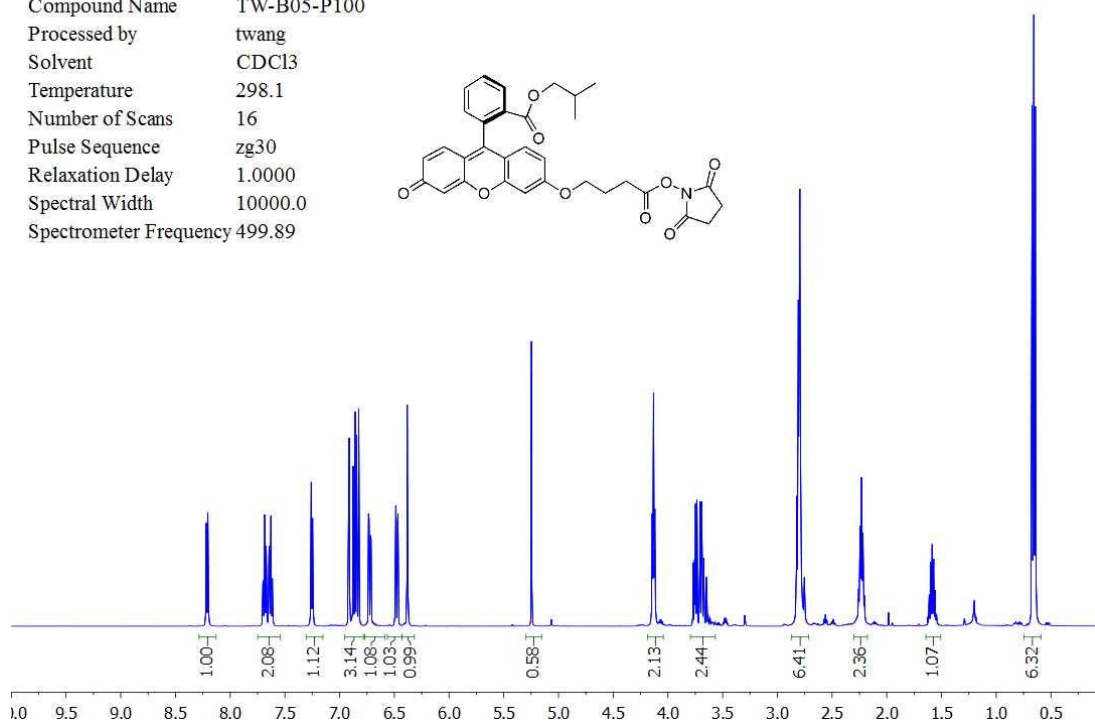

Figure S25. <sup>1</sup>H NMR spectrum of 20

Compound Name TW-B05-P100  
Processed by twang  
Solvent CDCl3  
Temperature 298.2  
Number of Scans 138  
Pulse Sequence zgpg30  
Relaxation Delay 2.0000  
Spectral Width 29761.9  
Spectrometer Frequency 125.71

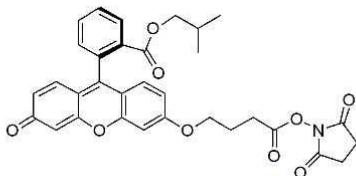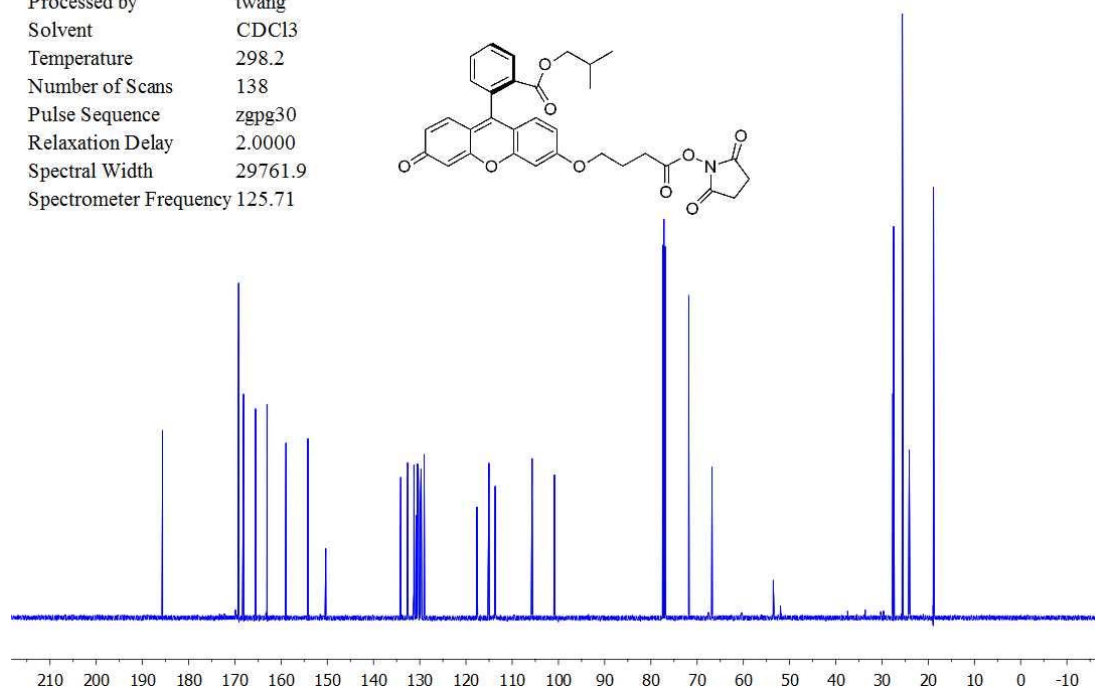

Figure S26. <sup>13</sup>C NMR spectrum of 20

Compound Name TW-B05-P61  
 Processed by twang  
 Solvent CDCl3  
 Temperature 298.3  
 Number of Scans 32  
 Pulse Sequence zg30  
 Relaxation Delay 1.0000  
 Spectral Width 10000.0  
 Spectrometer Frequency 499.89

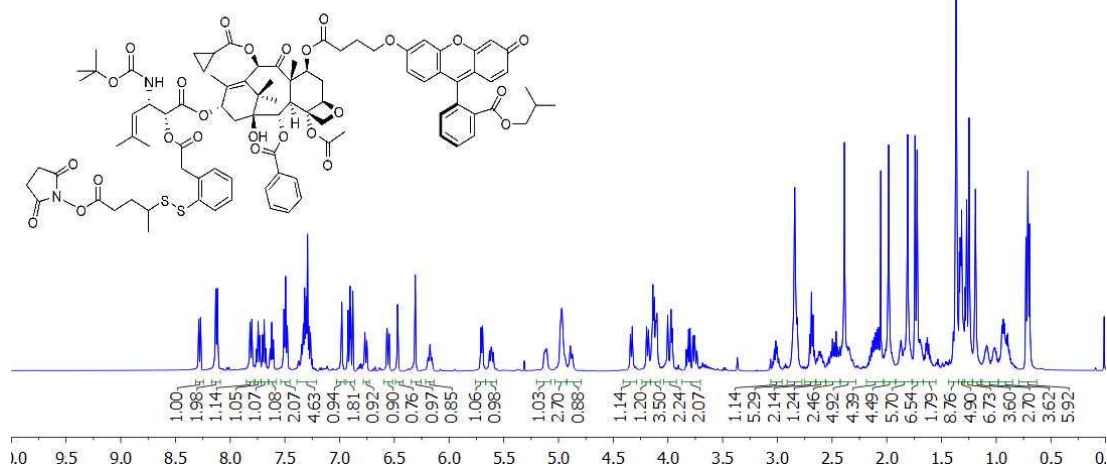

**Figure S27.**  $^1\text{H}$  NMR spectrum of **22**

Compound Name TW-B05-P61  
 Processed by twang  
 Solvent CDCl3  
 Temperature 298.3  
 Number of Scans 951  
 Pulse Sequence zgpg30  
 Relaxation Delay 2.0000  
 Spectral Width 29761.9  
 Spectrometer Frequency 125.71

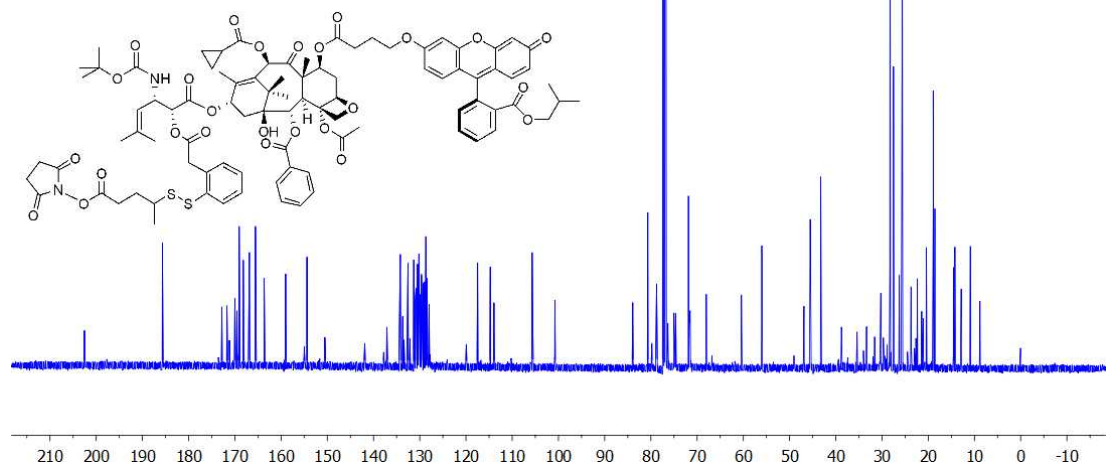

**Figure S28.**  $^{13}\text{C}$  NMR spectrum of **22**

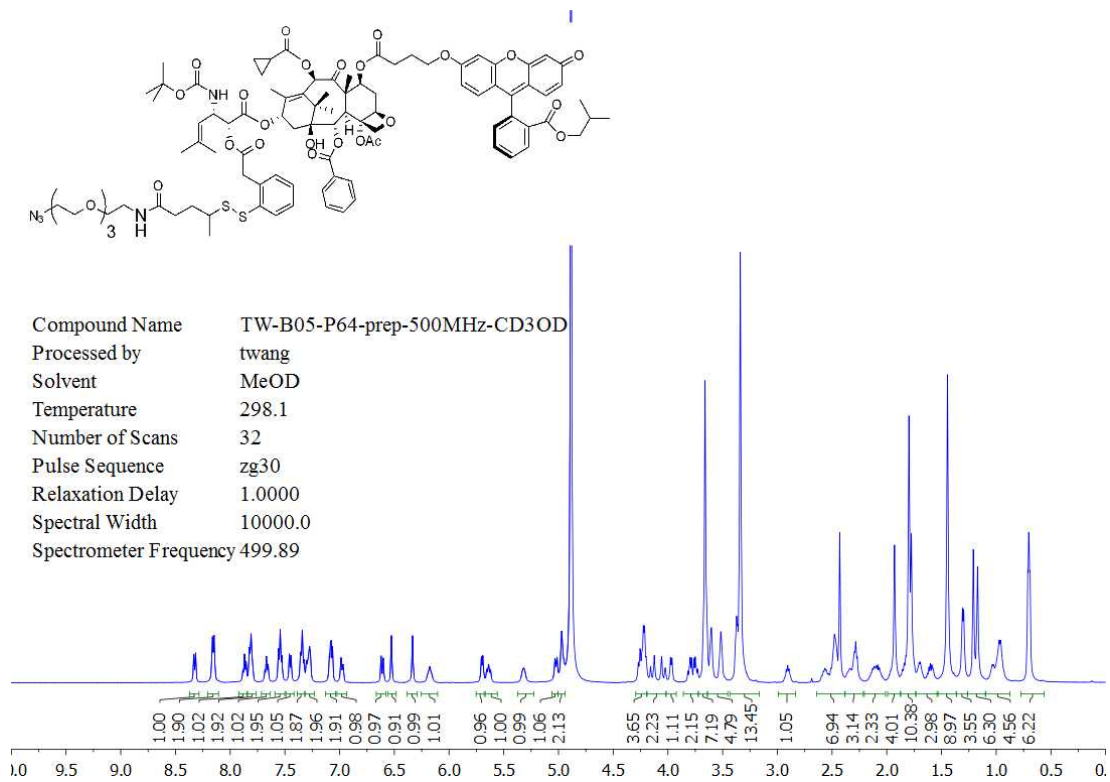

Figure S29. <sup>1</sup>H NMR spectrum of 24

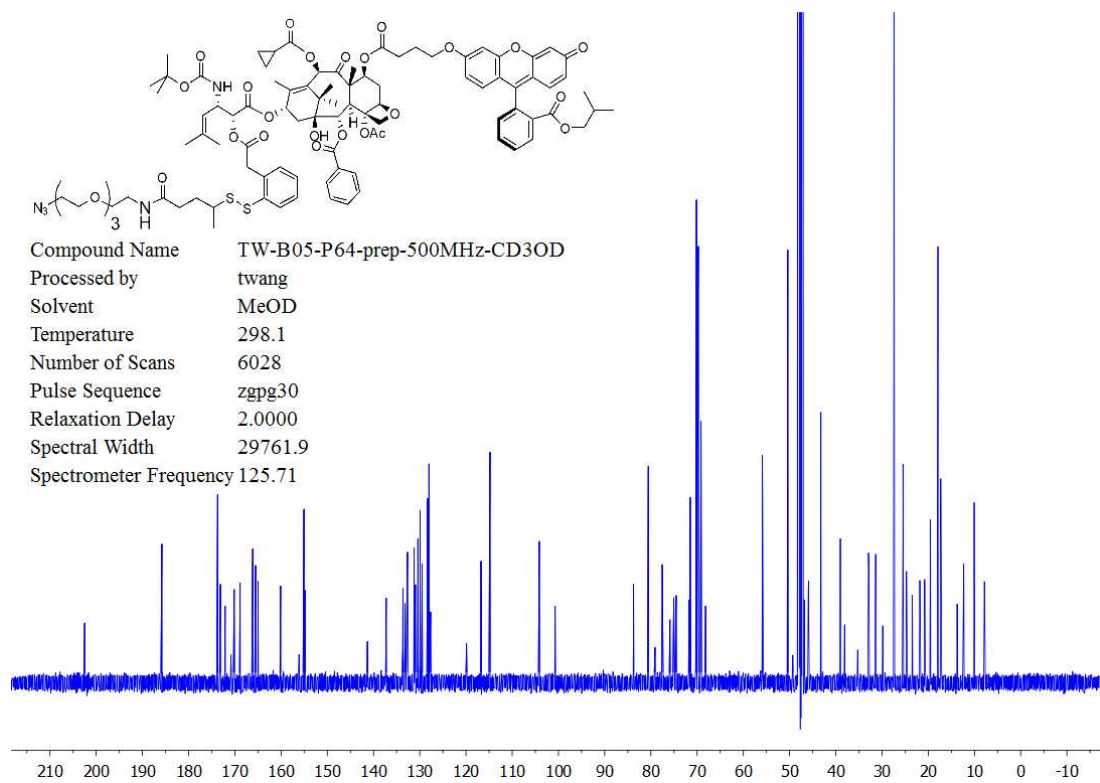

Figure S30. <sup>13</sup>C NMR spectrum of 24



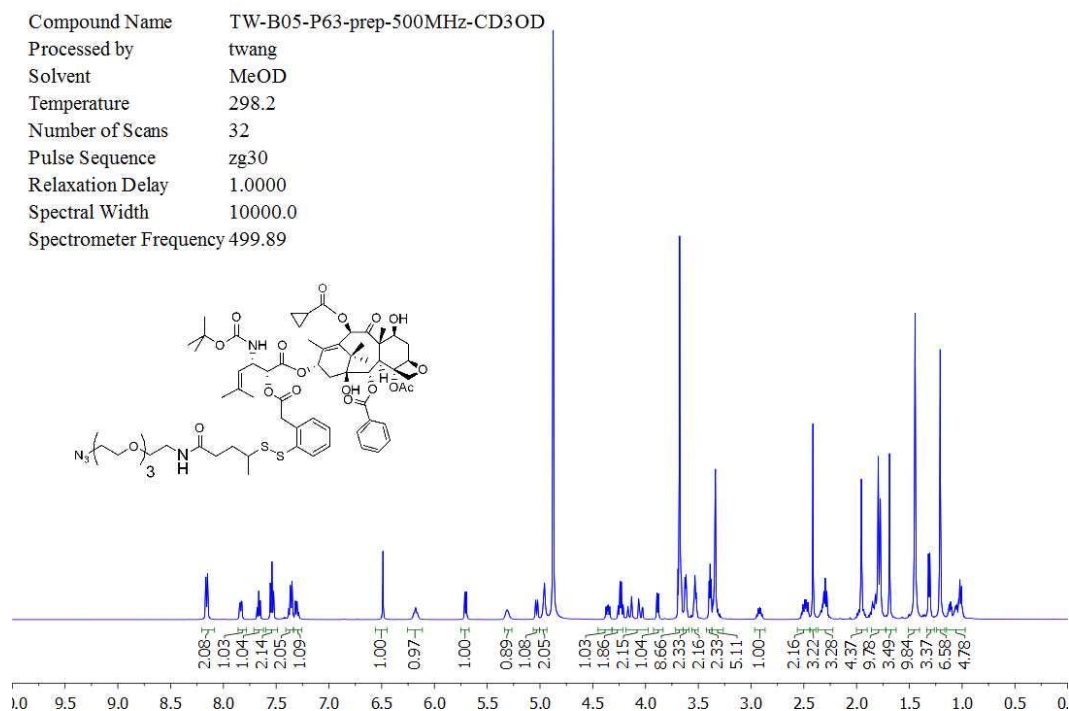

**Figure S31.**  $^1\text{H}$  NMR spectrum of **25**

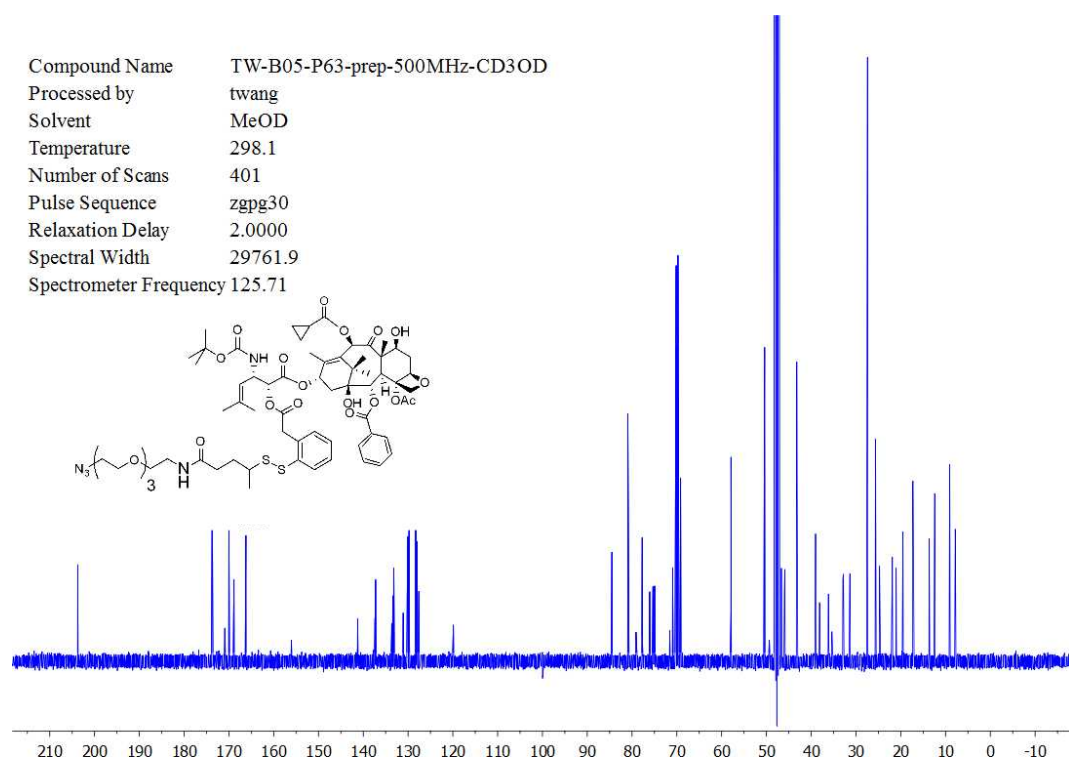

**Figure S32.**  $^{13}\text{C}$  NMR spectrum of **25**

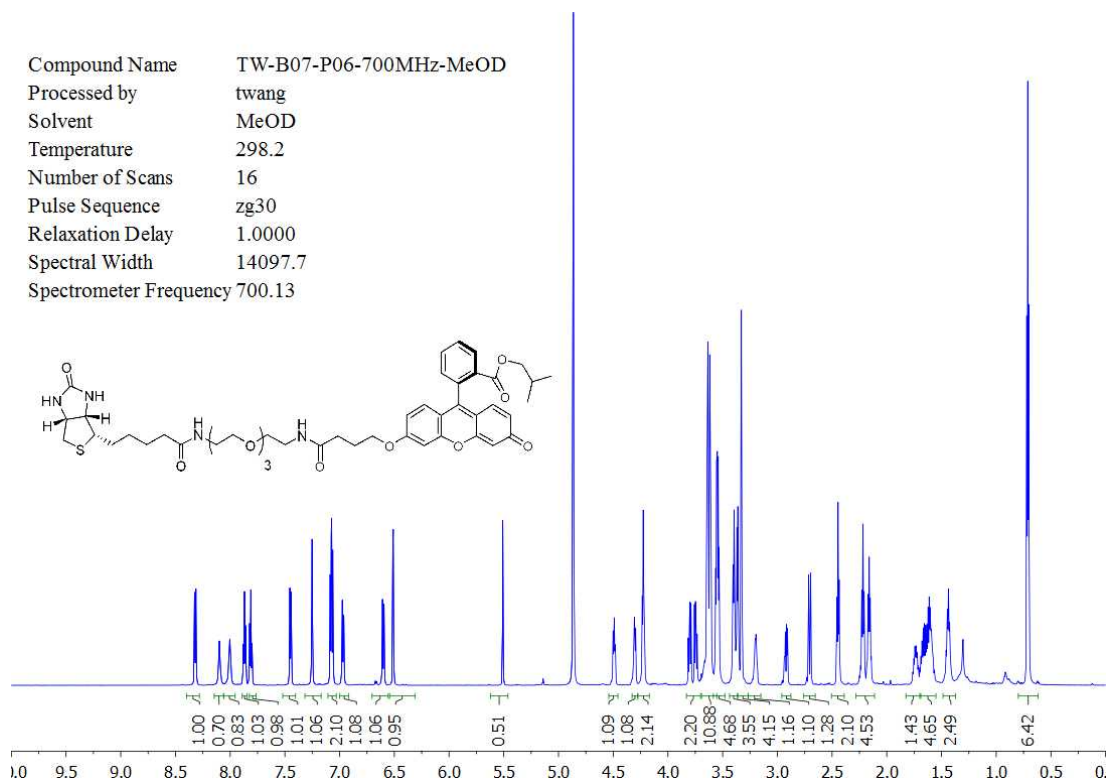

**Figure S33.**  $^1\text{H}$  NMR spectrum of **28**

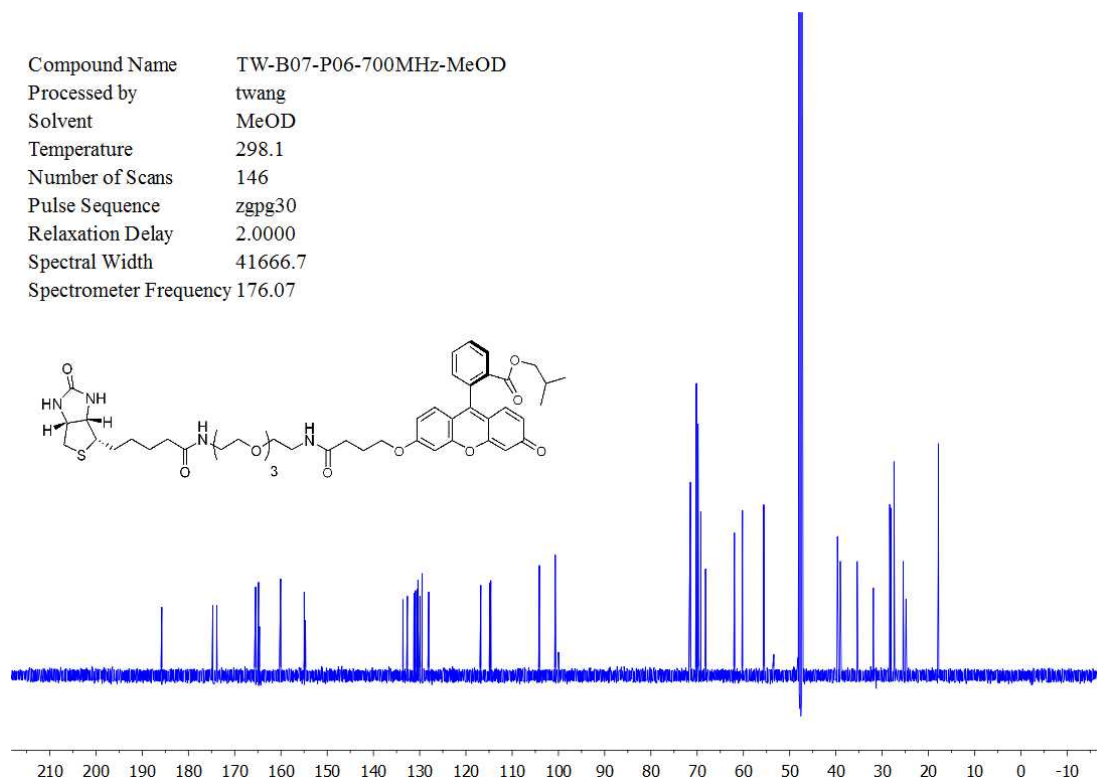

**Figure S34.**  $^{13}\text{C}$  NMR spectrum of **28**

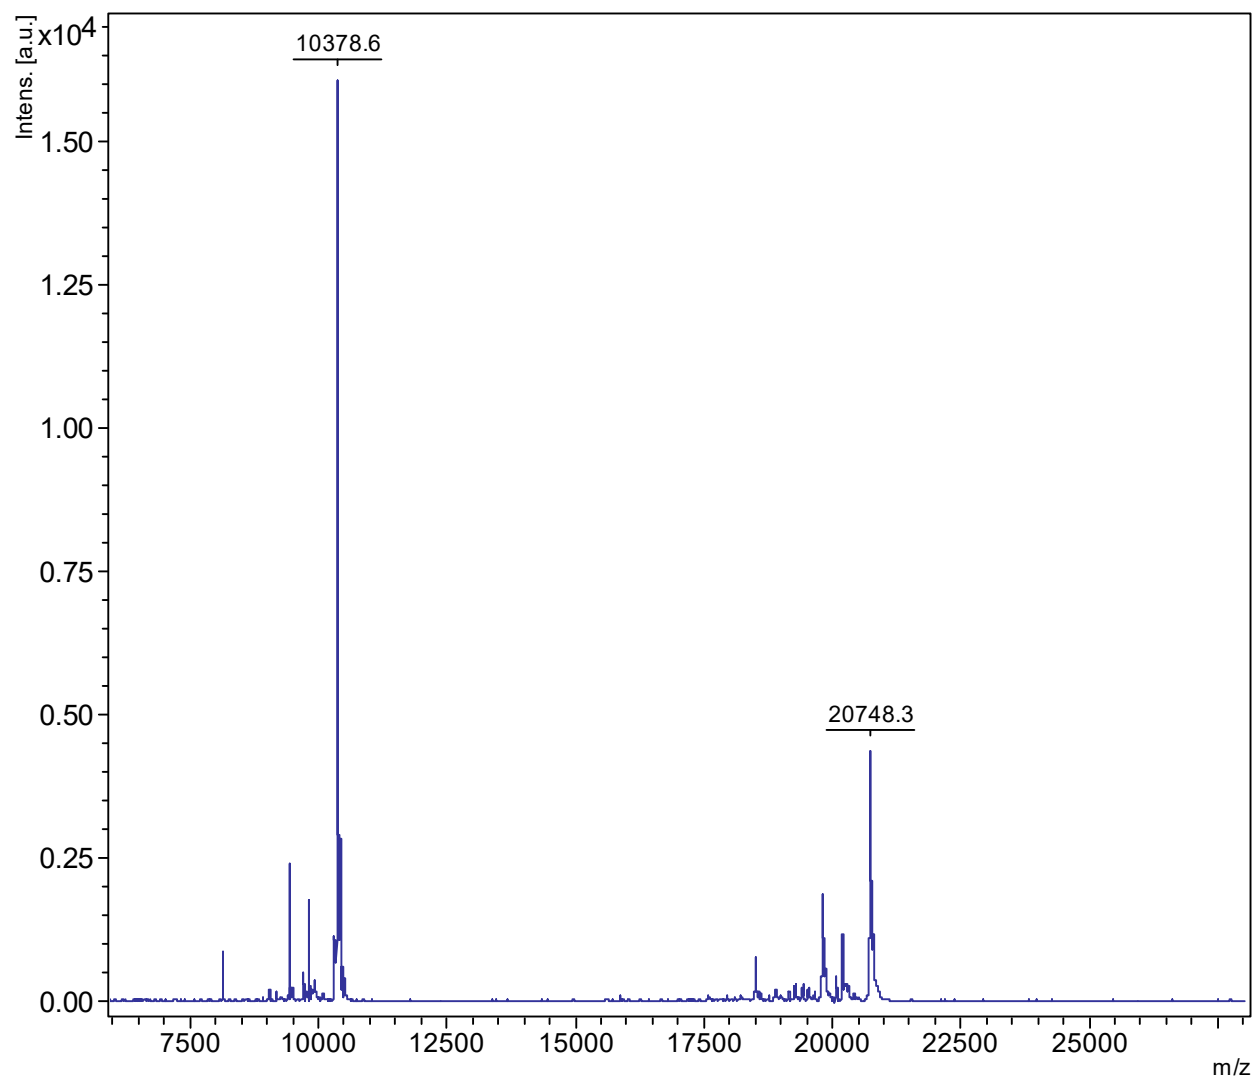

**Figure S35.** MALDI-TOF analysis of fully biotinylated G3 PAMAM dendrimer 7.

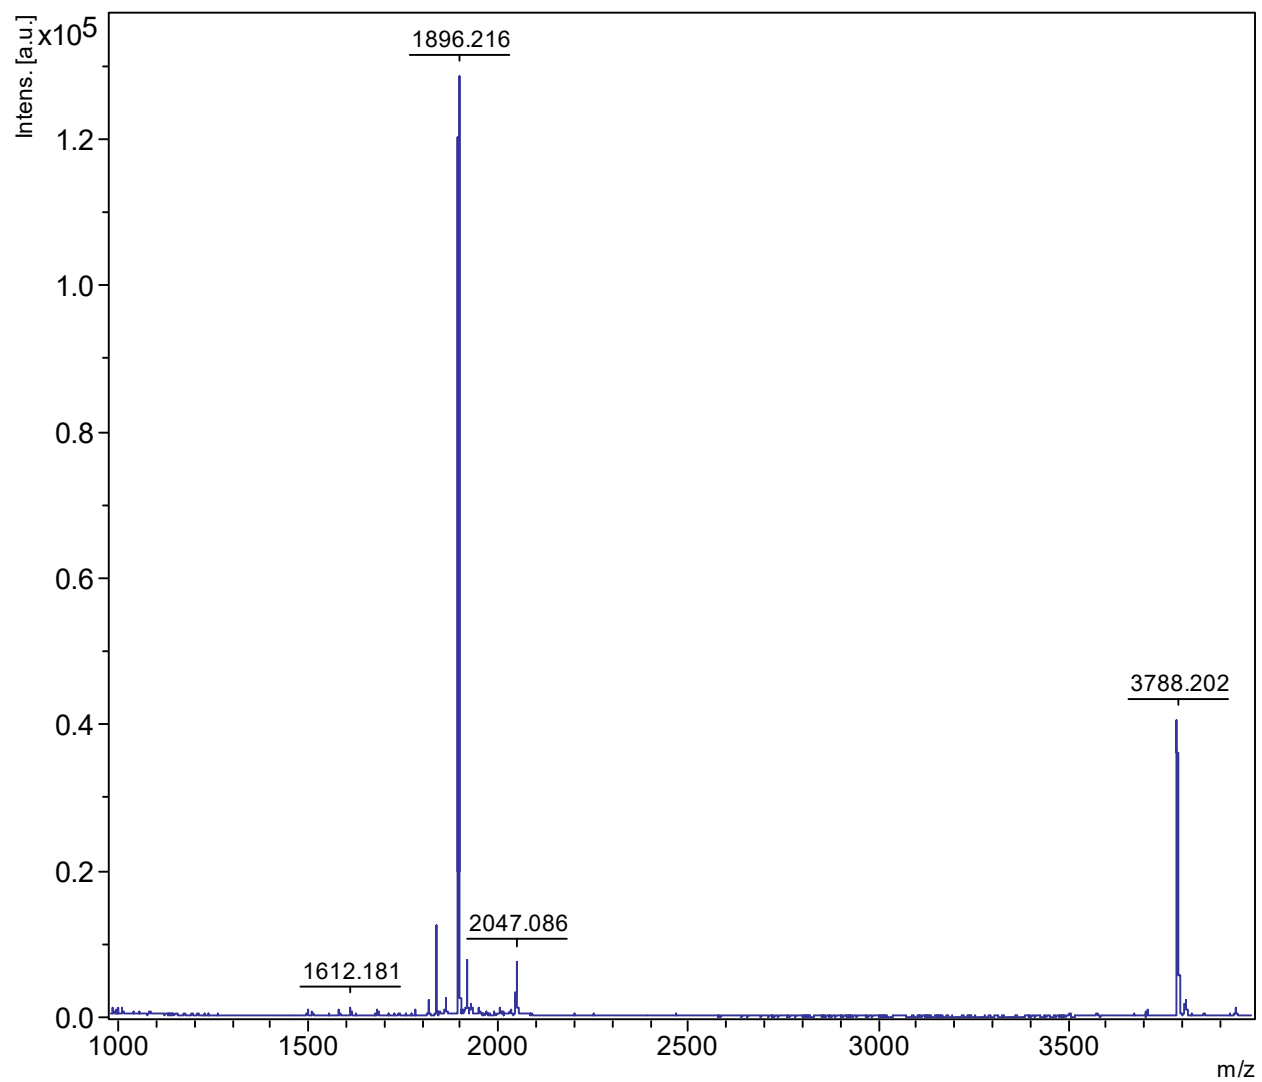

**Figure S36.** MALDI-TOF analysis of fully alkynylated G1-PAMAM dendrimer **8**.

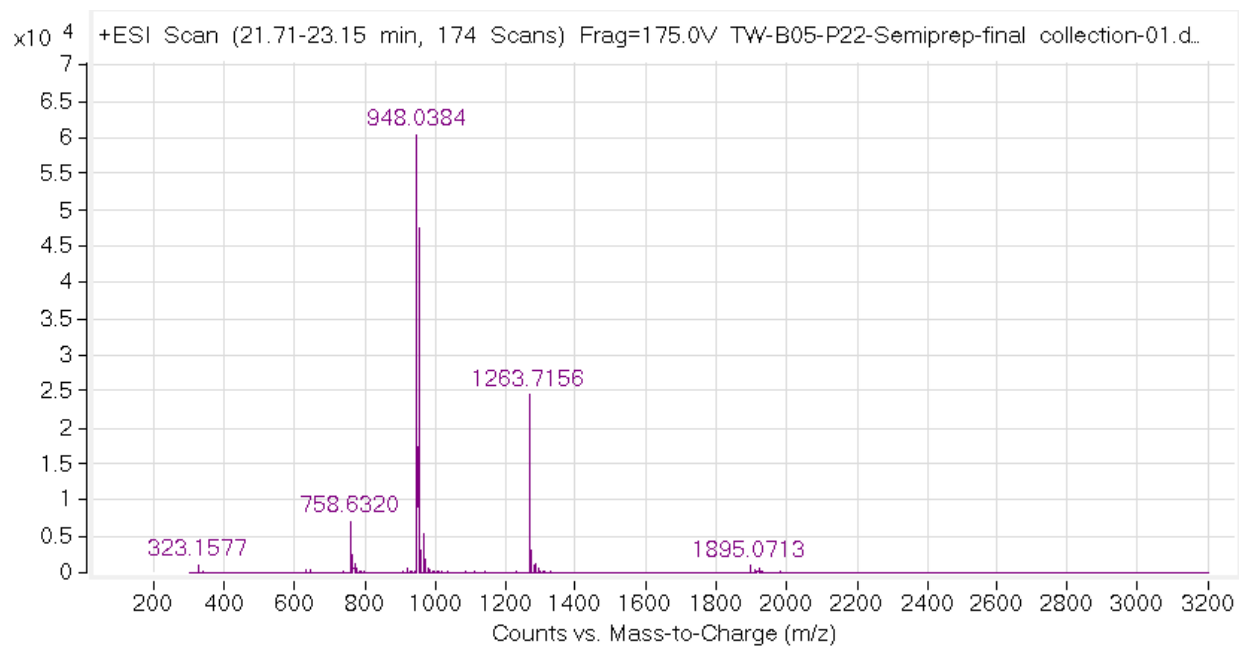

**Figure S37.** LC-UV-TOF analysis of fully alkynylated G1-PAMAM dendrimer **8**.

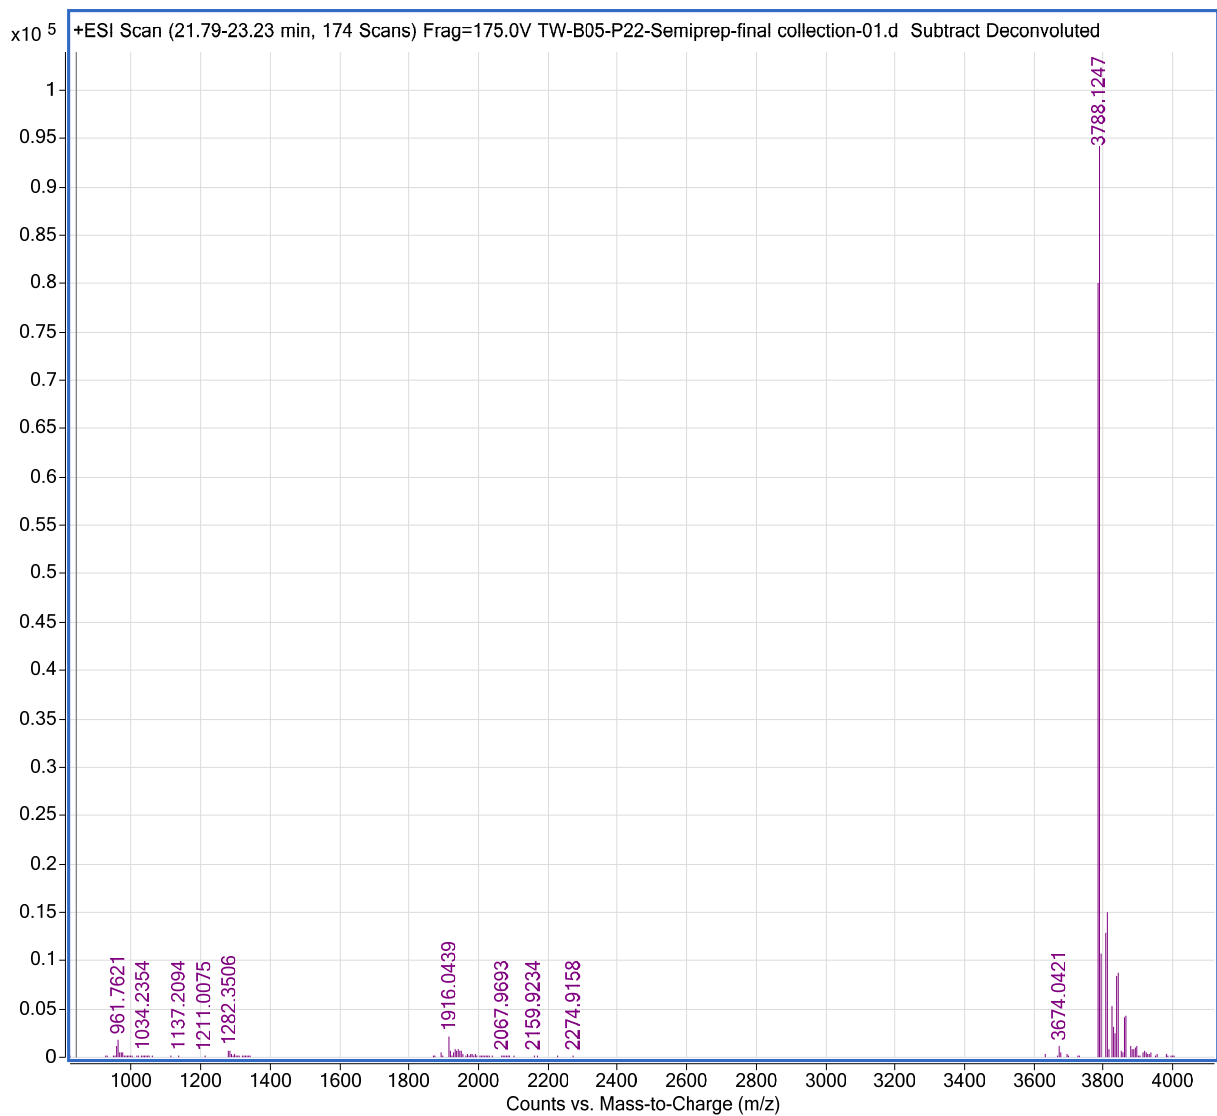

**Figure S38.** LC-TOF deconvolution result for fully alkynylated G1-PAMAM dendrimer **8**.

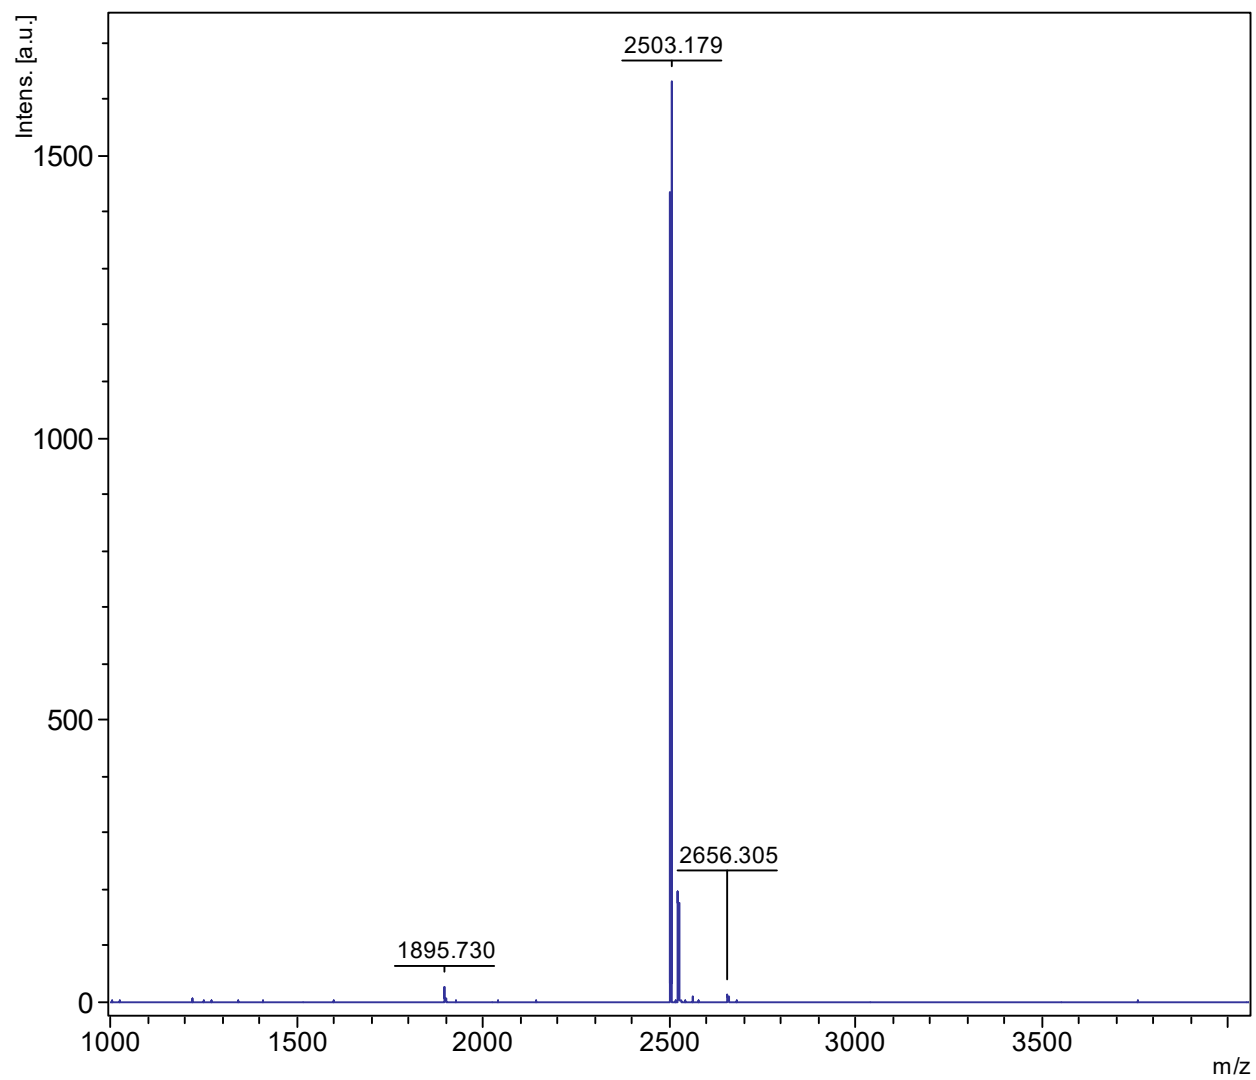

**Figure S39.** MALDI-TOF analysis of G1-PAMAM half-dendron-linker **12**.

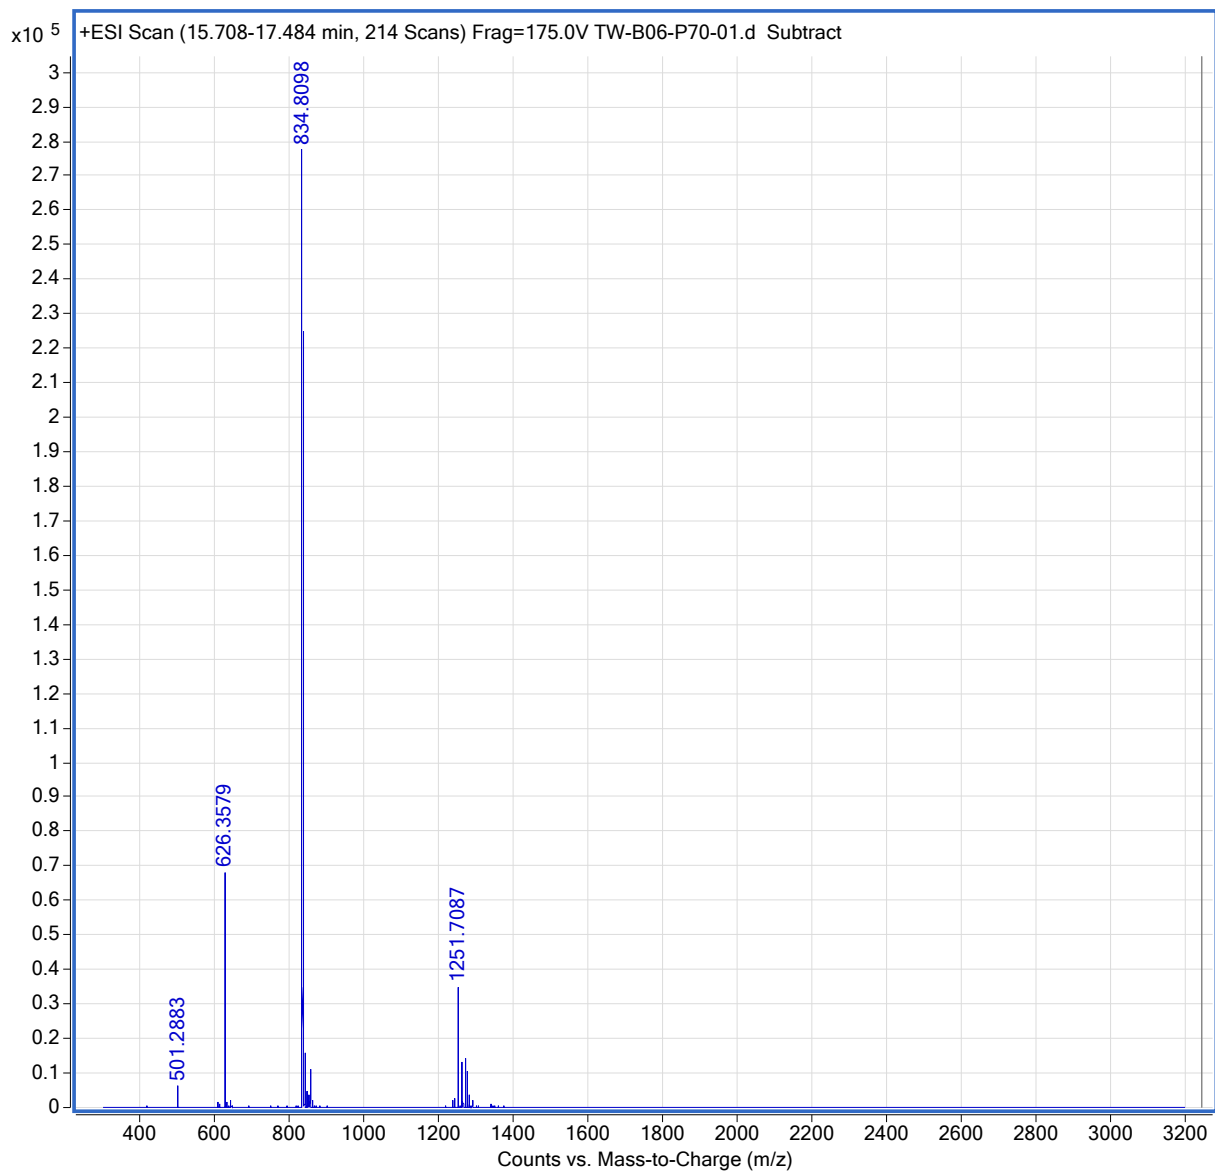

**Figure S40.** LC-UV-TOF analysis of G1-PAMAM half-dendron-linker **12**.



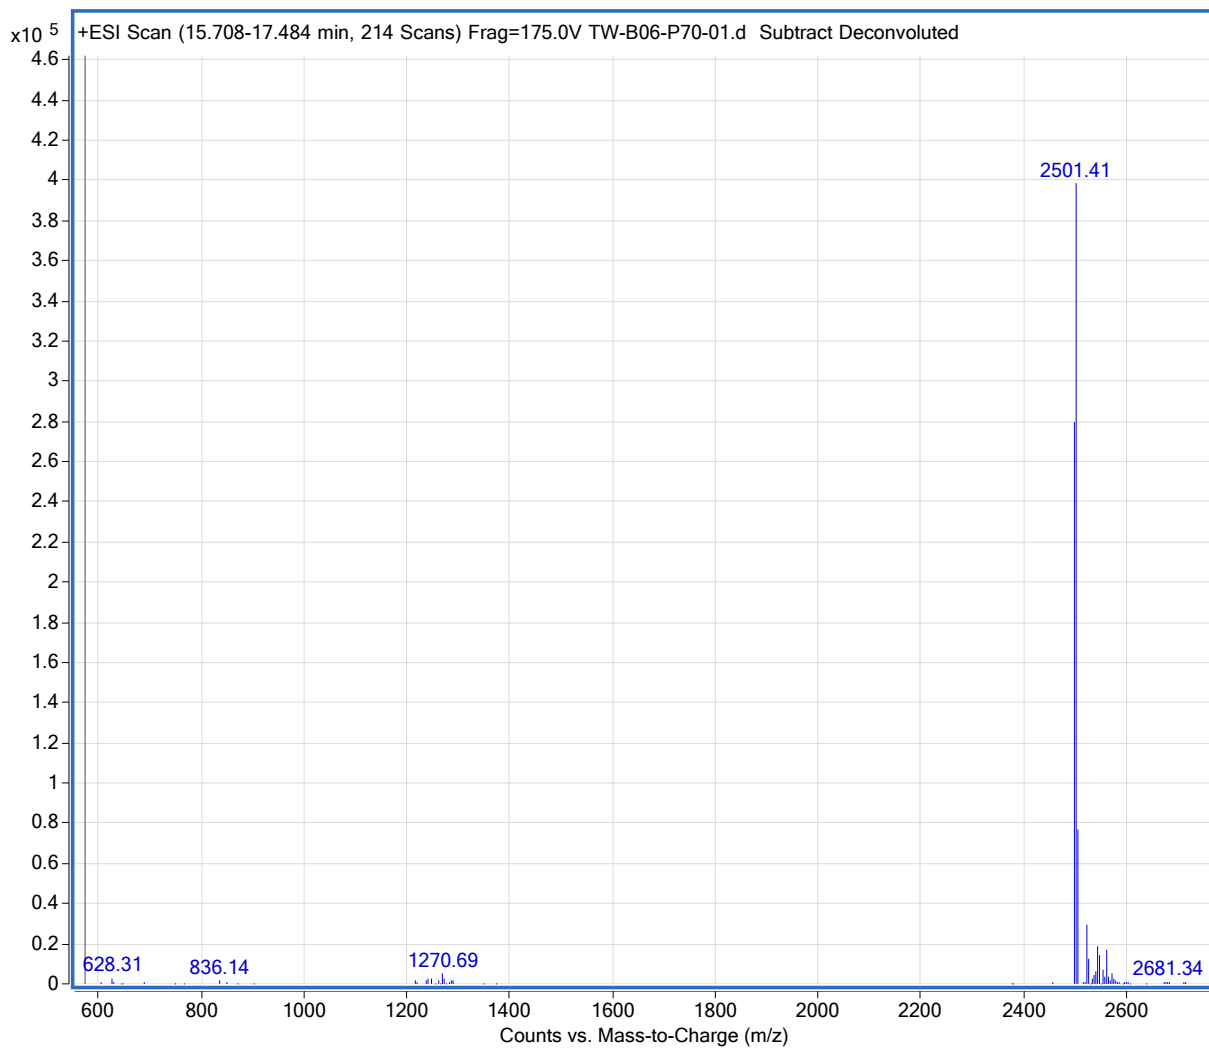

**Figure S41.** LC-UV-TOF deconvolution result for G1-PAMAM half-dendron-linker **12**.

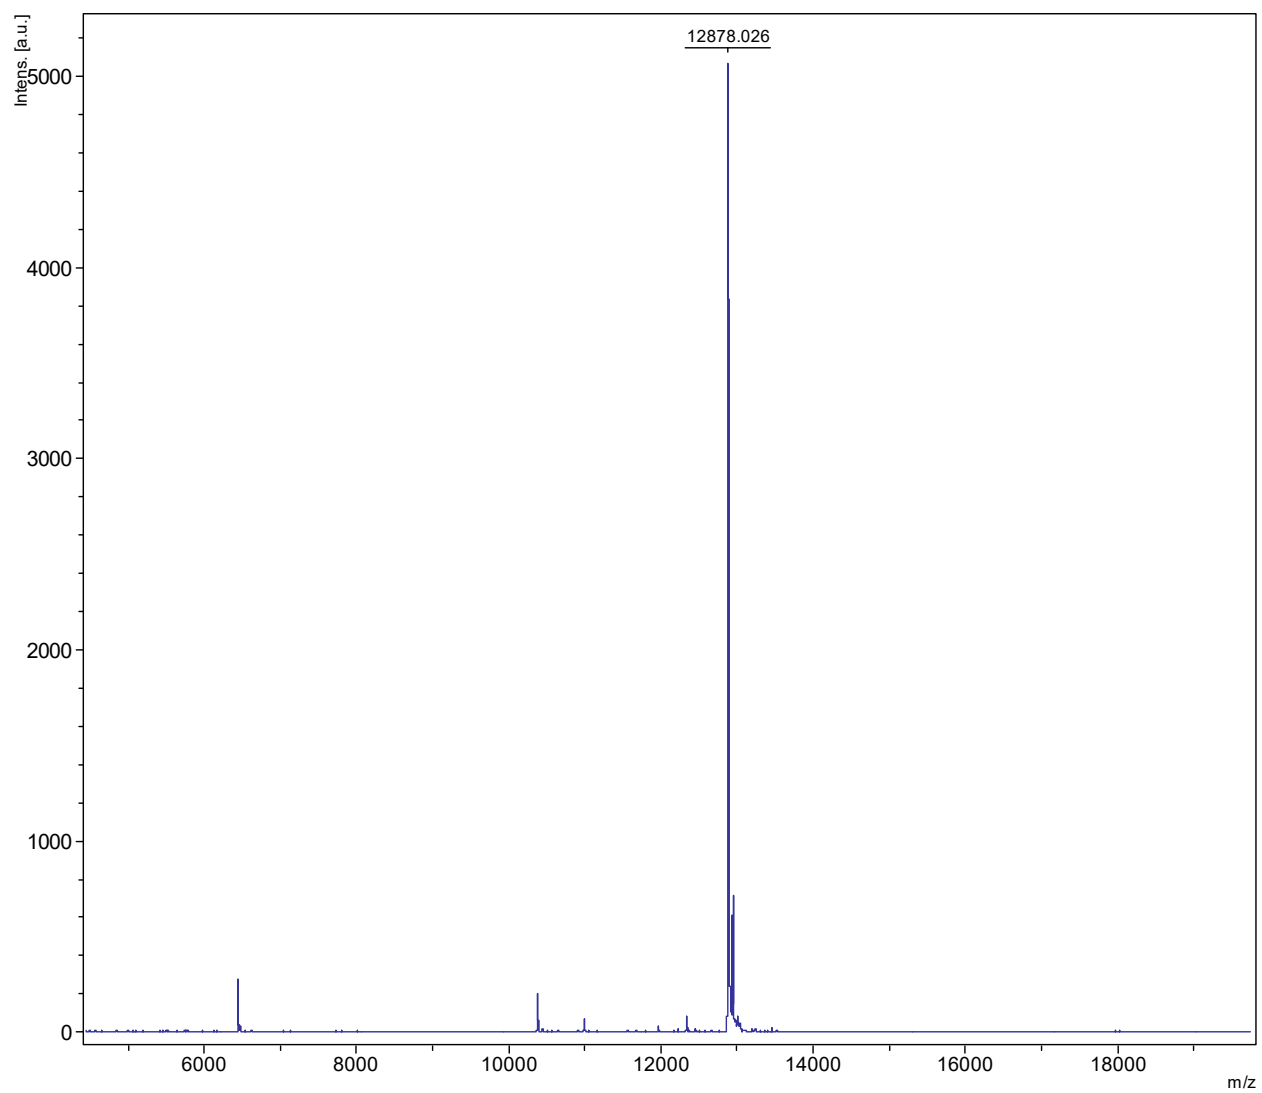

**Figure S42.** MALDI-TOF analysis of (G1 half-dendron)-linker-(G3 half-dendron) **6**.

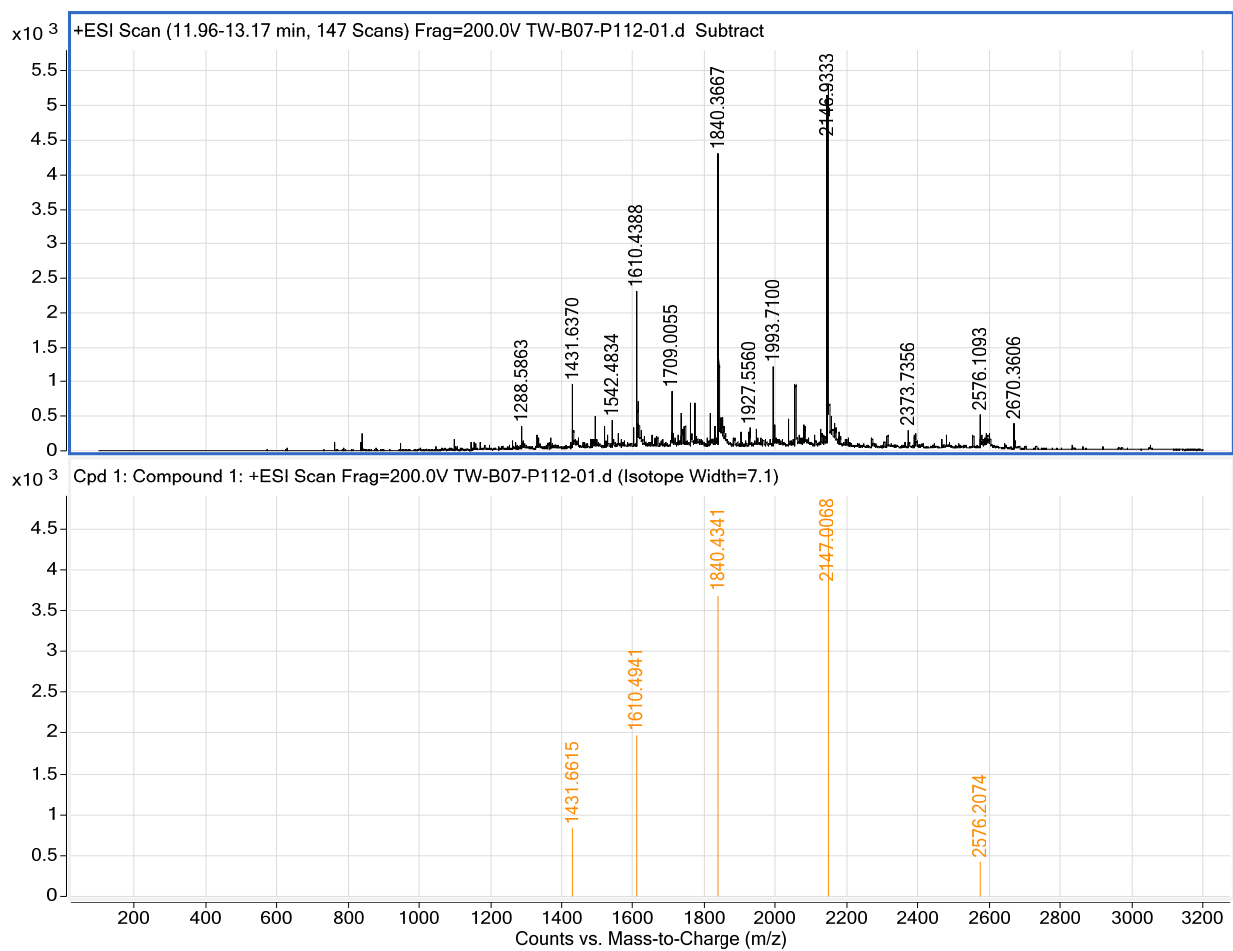

**Figure S43.** LC-UV-TOF mass analysis of (G1 half-dendron)-linker-(G3 half-dendron) **6**.

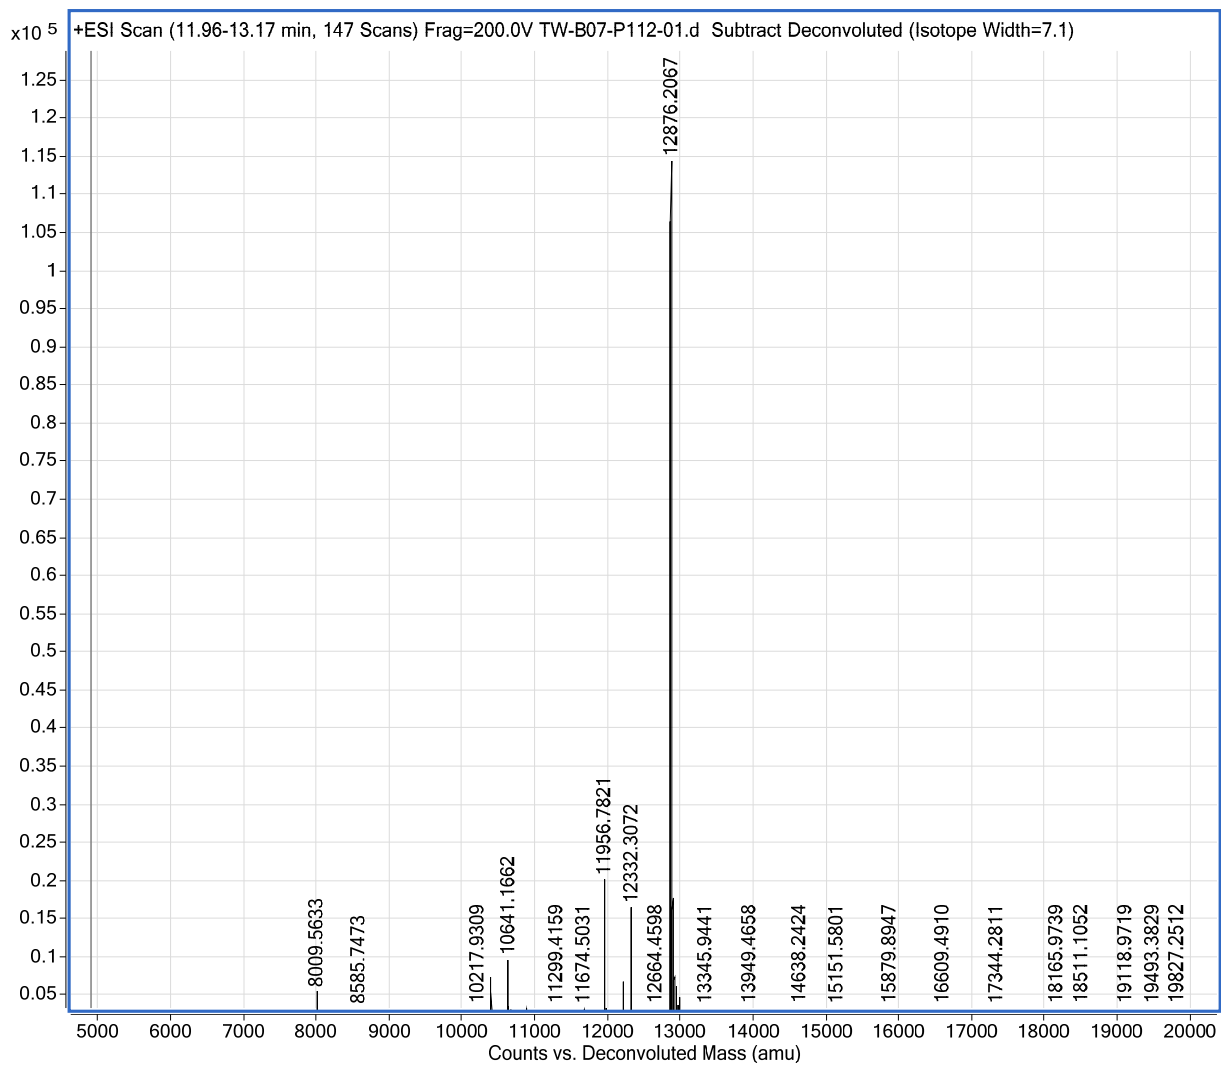

**Figure S44.** LC-UV-TOF deconvolution result of (G1 half-dendron)-linker-(G3 half-dendron) **6**.

(A)

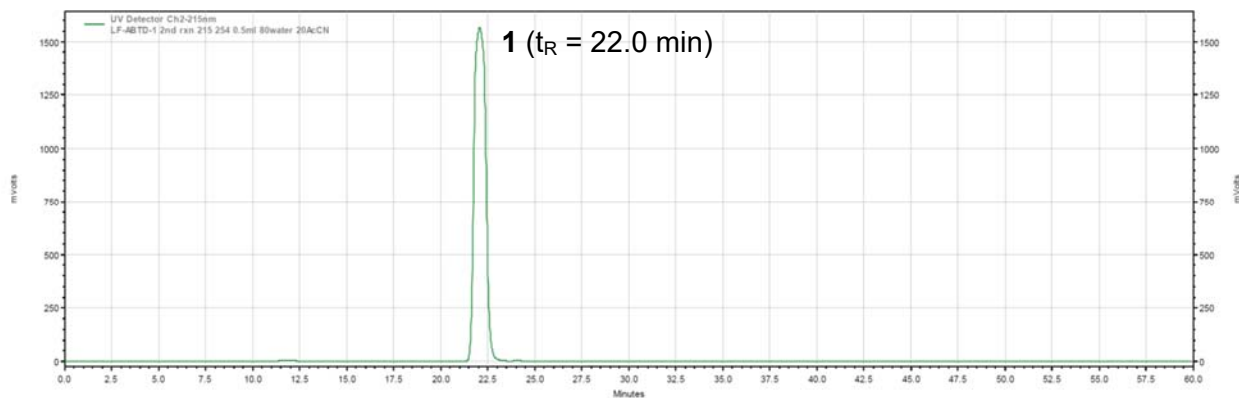

(B)

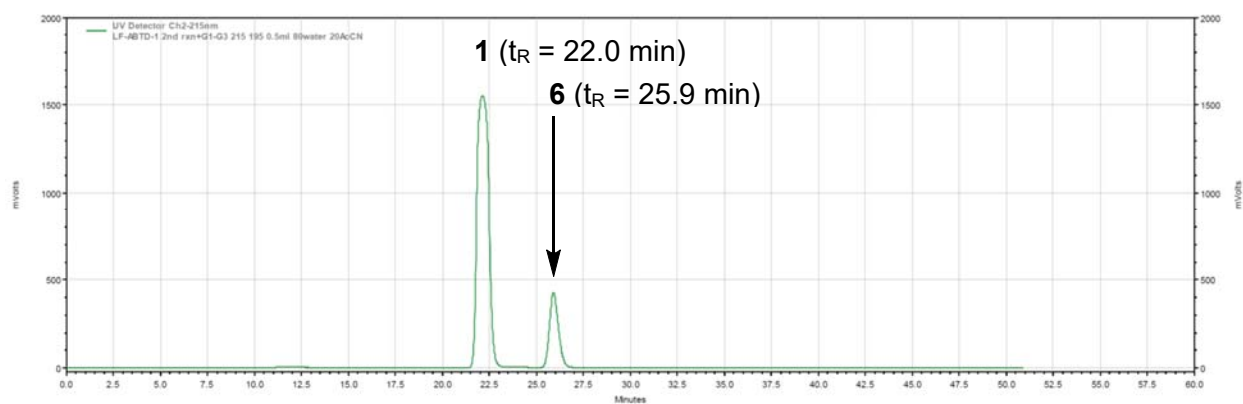

**Figure S45.** GPC analysis of (A) ABTD-TTC-1 (**1**) and (B) ABTD-TTC-1 (**1**) + click-ready ABTD **6**. Conditions: Ultrahydrogel™ 500 column (7.8 mm x 300 mm, 10  $\mu$ m); MeCN/H<sub>2</sub>O (20/80); 0.5 mL/min; 55  $\mu$ M; UV detector at 215 nm.

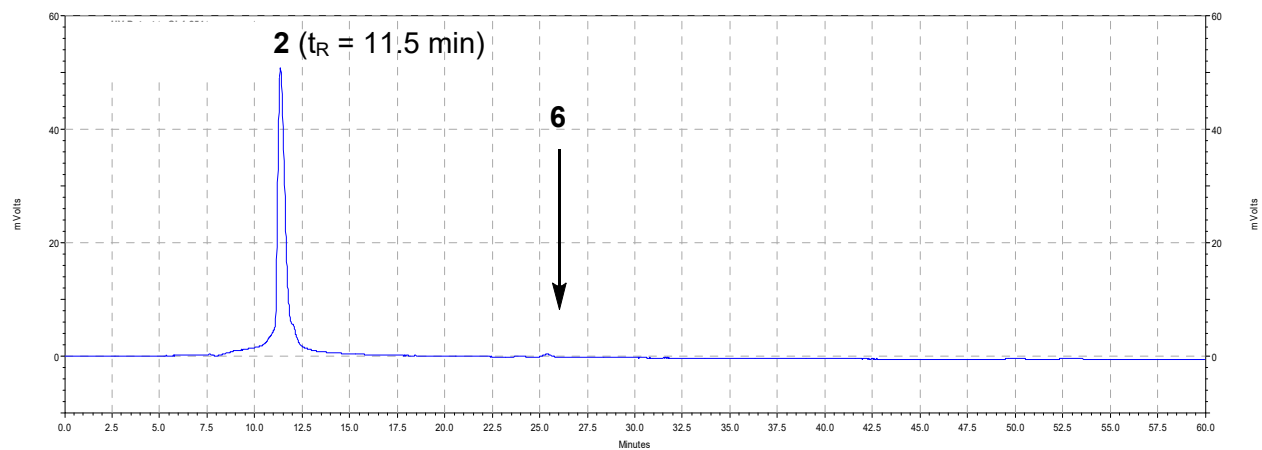

**Figure S46.** GPC analysis of ABTD-TTC-2 (**2**). Conditions: Ultrahydrogel<sup>TM</sup> 500 column (7.8 mm x 300 mm, 10  $\mu$ m); MeCN/H<sub>2</sub>O (20/80); 0.5 mL/min; 50  $\mu$ M; UV detector at 254 nm. The anticipated t<sub>R</sub> of **6** is also shown.

(A)

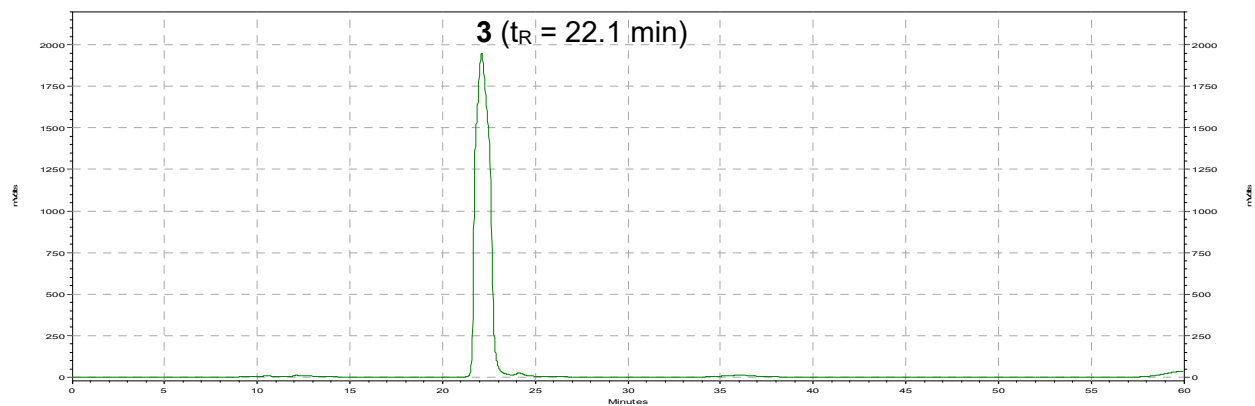

(B)

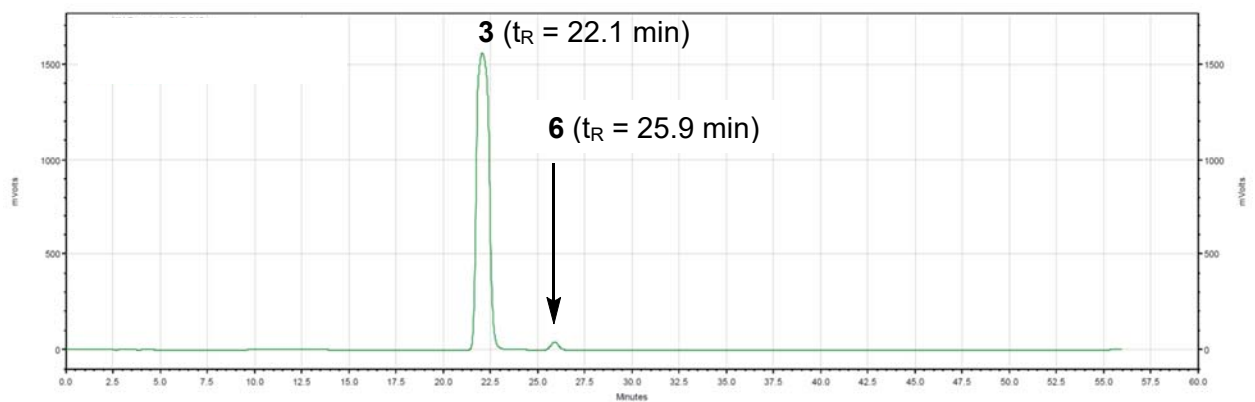

**Figure S47.** GPC analysis of (A) ABTD-TTC-3 (**3**) and (B) ABTD-TTC-2 (**2**) + click-ready ABTD **6**. Conditions: Ultrahydrogel™ 500 column (7.8 mm x 300 mm); MeCN/H<sub>2</sub>O (20/80); 0.5 mL/min; 64 μM; UV detector at 215 nm.

(A)

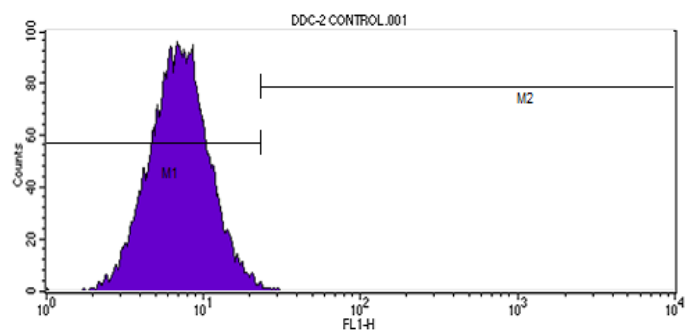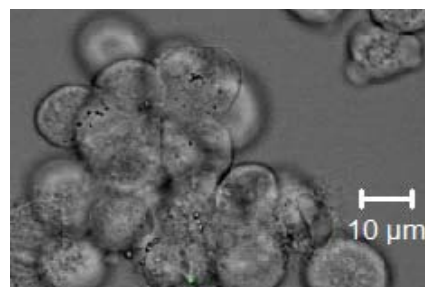

(B)

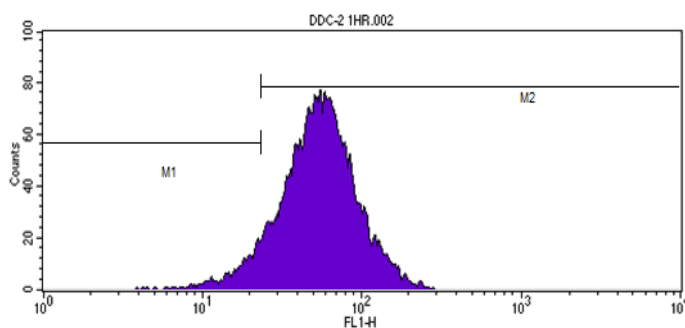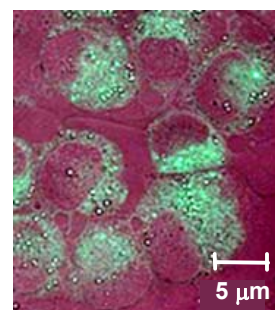

**Figure S48.** Internalization of fluorescent probe ABTD-TTC-2 (**2**) (20  $\mu\text{M}$ ) in ID-8 (ovarian cancer) cells by confocal fluorescence microscopy (CFM) and flow cytometry after 1 h of incubation at 37  $^{\circ}\text{C}$  (B) as compared to the control ID8 cells (A).



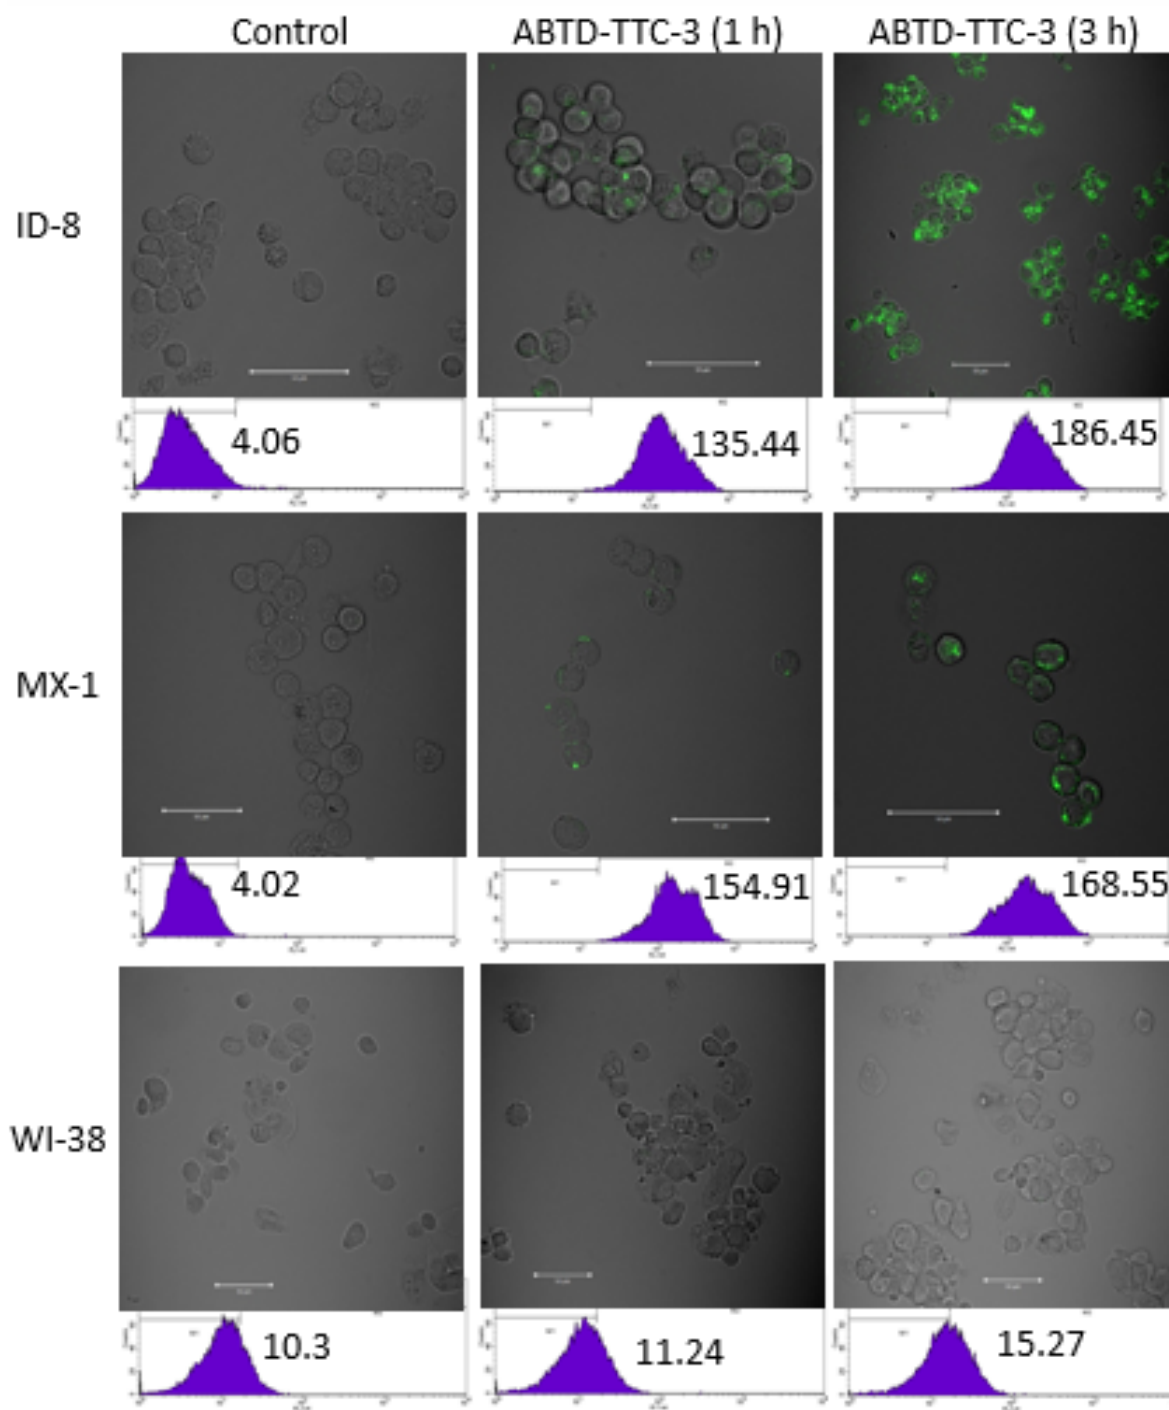

**Figure S49.** Assessment of the internalization of fluorescent probe ABTD-TTC-3 (**3**) (20  $\mu$ M) in ID-8 (ovarian cancer), MX-1 (breast cancer) and WI-38 (normal lung fibroblast) cells by confocal fluorescence microscopy (CFM) and flow cytometry at 0 h, 1 h, and 3 h periods, at 37  $^{\circ}$ C.

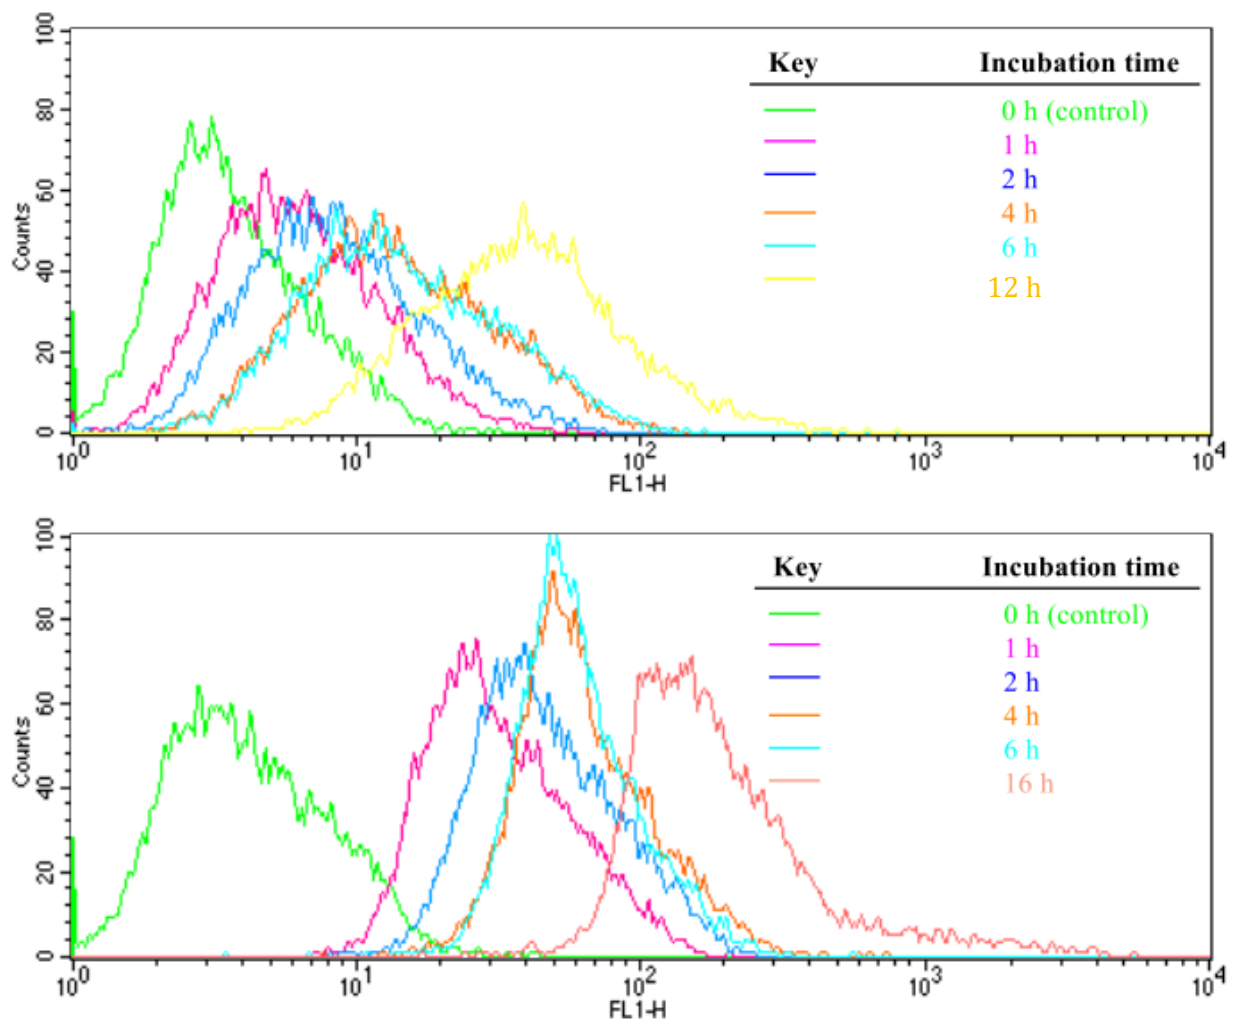

**Figure S50.** Assessment of the multi-binding effect by flow cytometry based on the internalization of fluorescent probe **28** (10  $\mu$ M, top) and ABTD-TTC-3 (**3**) (10  $\mu$ M, bottom) in ID-8 cells at 0, 1, 2, 4, 6 and 16 h periods, at 37  $^{\circ}$ C.

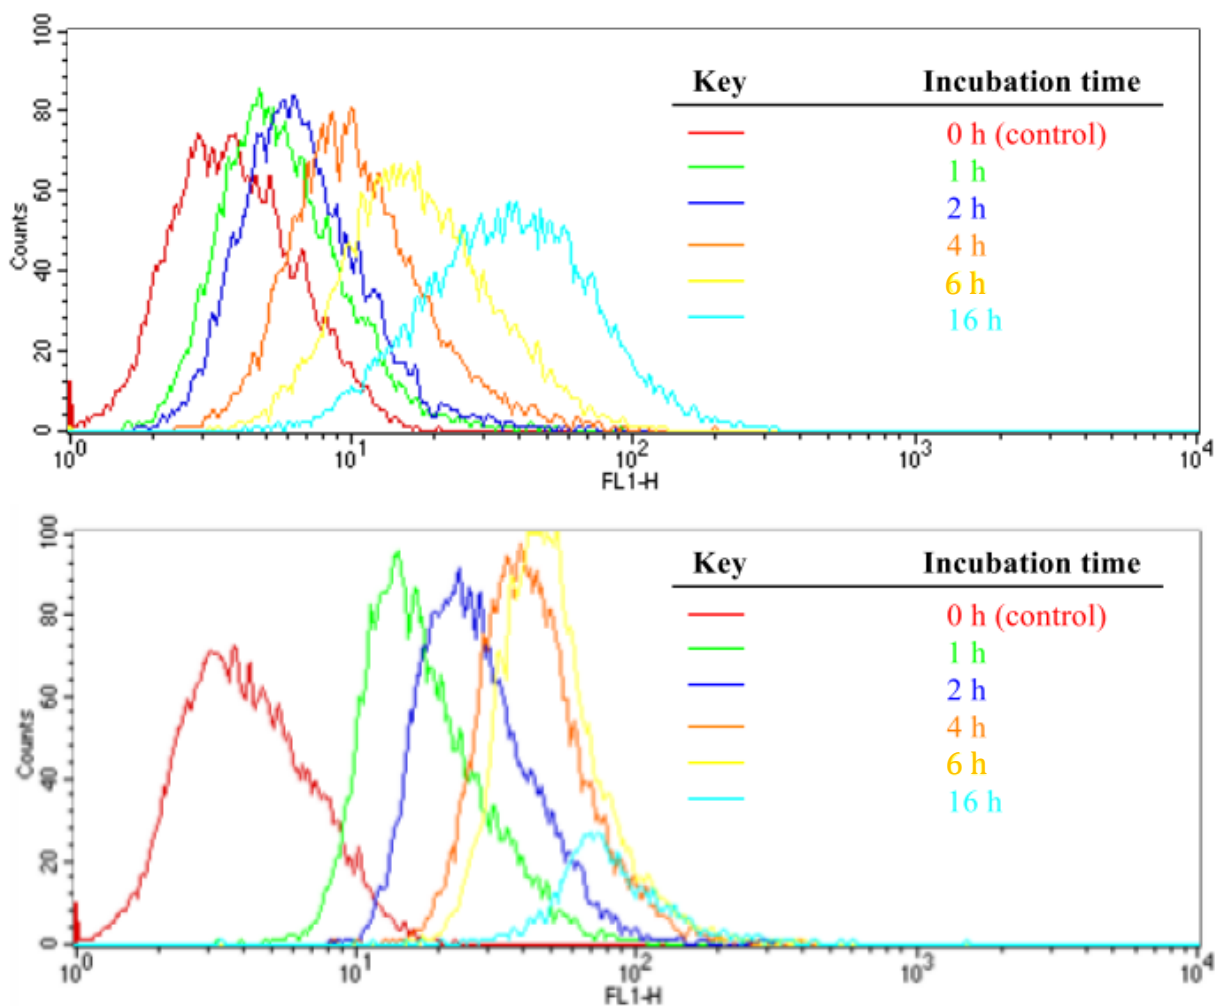

**Figure S51.** Assessment of the multi-binding effect by flow cytometry based on the internalization of fluorescent probe **28** (10  $\mu$ M, top) and ABTD-TTC-3 (**3**) (10  $\mu$ M, bottom) in MX-1 cells at 0, 1, 2, 4, 6 and 16 h periods, at 37  $^{\circ}$ C.
